1 **An emerging SARS-CoV-2 mutant evading cellular immunity and increasing**  
2 **viral infectivity**

3  
4 Chihiro Motozono<sup>1</sup>, Mako Toyoda<sup>1</sup>, Jiri Zahradnik<sup>2</sup>, Terumasa Ikeda<sup>3</sup>, Akatsuki  
5 Saito<sup>4,5,6</sup>, Toong Seng Tan<sup>1</sup>, Isaac Ngare<sup>1</sup>, Hesham Nasser<sup>3</sup>, Izumi Kimura<sup>7</sup>, Keiya  
6 Uriu<sup>7</sup>, Yusuke Kosugi<sup>7</sup>, Shiho Torii<sup>8,9,10</sup>, Akiko Yonekawa<sup>11</sup>, Nobuyuki Shimono<sup>11</sup>,  
7 Yoji Nagasaki<sup>12</sup>, Rumi Minami<sup>13</sup>, Takashi Toya<sup>14</sup>, Noritaka Sekiya<sup>15,16</sup>, Takasuke  
8 Fukuhara<sup>17</sup>, Yoshiharu Matsuura<sup>8,9,10</sup>, Gideon Schreiber<sup>2</sup>, The Genotype to  
9 Phenotype Japan (G2P-Japan) consortium, So Nakagawa<sup>18,19\*</sup>, Takamasa Ueno<sup>1\*</sup>,  
10 Kei Sato<sup>7,19,20,21\*</sup>

11  
12 <sup>1</sup> Division of Infection and immunity, Joint Research Center for Human Retrovirus  
13 infection, Kumamoto University, Kumamoto 8600811, Japan

14 <sup>2</sup>Department of Biological Chemistry, Weizmann Institute of Science, Rehovot 76100,  
15 Israel

16 <sup>3</sup> Division of Molecular Virology and Genetics, Joint Research Center for Human  
17 Retrovirus infection, Kumamoto University, Kumamoto 8600811, Japan

18 <sup>4</sup> Department of Veterinary Science, Faculty of Agriculture, University of Miyazaki,  
19 Miyazaki 8892192, Japan

20 <sup>5</sup> Center for Animal Disease Control, University of Miyazaki, Miyazaki 8892192,  
21 Japan

22 <sup>6</sup> Graduate School of Medicine and Veterinary Medicine, University of Miyazaki,  
23 Miyazaki 8892192, Japan

24 <sup>7</sup> Division of Systems Virology, Department of Infectious Disease Control,  
25 International Research Center for Infectious Diseases, The Institute of Medical  
26 Science, The University of Tokyo, Tokyo 1088639, Japan

27 <sup>8</sup> Department of Molecular Virology, Research Institute for Microbial Diseases,  
28 Osaka University, Osaka 5650871, Japan

29 <sup>9</sup>Division of Microbiology and Immunology, Center for Infectious Diseases Education  
30 and Research, Osaka University, Osaka 5650871, Japan

31 <sup>10</sup> Laboratory of Virus Control, Research Institute for Microbial Diseases, Osaka  
32 University, Osaka 5650871, Japan

33 <sup>11</sup> Department of Medicine and Biosystemic Science, Graduate School of Medical  
34 Sciences, Kyushu University, Fukuoka 8128582, Japan

35 <sup>12</sup> Division of Infectious Diseases, Clinical Research Institute, National  
36 Hospitalization Organization, Kyushu Medical Center, Fukuoka 8108563, Japan

37 <sup>13</sup> Internal Medicine, Clinical Research Institute, National Hospital Organization,  
38 Kyushu Medical Center, Fukuoka 8108563, Japan

39 <sup>14</sup> Hematology Division, Tokyo Metropolitan Cancer and Infectious Diseases Center  
40 Komagome Hospital, Tokyo 1138677, Japan.

41 <sup>15</sup> Department of Infection Prevention and Control, Tokyo Metropolitan Cancer and  
42 Infectious Diseases Center Komagome Hospital, Tokyo 1138677, Japan.

43 <sup>16</sup> Department of Clinical Laboratory, Tokyo Metropolitan Cancer and Infectious  
44 Diseases Center Komagome Hospital, Tokyo 1138677, Japan.

45 <sup>17</sup> Department of Microbiology and Immunology, Graduate School of Medicine,  
46 Hokkaido University, Hokkaido 0608638, Japan

47 <sup>18</sup> Department of Molecular Life Science, Tokai University School of Medicine,  
48 Kanagawa 2591193, Japan

49 <sup>19</sup> CREST, Japan Science and Technology Agency, Saitama 3220012, Japan

50 <sup>20</sup> Twitter: @SystemsVirology

51 <sup>21</sup> Lead Contact

52 \*Correspondences:

53 [so@tokai.ac.jp](mailto:so@tokai.ac.jp) (S.N.)

54 [uenotaka@kumamoto-u.ac.jp](mailto:uenotaka@kumamoto-u.ac.jp) (T.U.)

55 [KeiSato@g.ecc.u-tokyo.ac.jp](mailto:KeiSato@g.ecc.u-tokyo.ac.jp) (K.S.)

56

57 **Conflict of interest:** The authors declare that no competing interests exist.

58 **Short title:** SARS-CoV-2 variants escape from cellular immunity (50/50 characters)

59 **Keywords:** SARS-CoV-2; COVID-19; cellular immunity; spike protein; receptor  
60 binding motif; mink; zoonosis; naturally occurring variants; B.1.427/429; B.1.298;  
61 L452R; Y453F

62

63

64 **Highlights** (85 characters including spaces)

65 ● L452R (in B.1.427/429) and Y453F (in B.1.298) variants in S RBM have  
66 emerged

67 ● L452R and Y453F mutants escape from HLA-24-restricted cellular immunity

68 ● L452R increases viral infectivity and potentially promotes viral replication

69 ● Epidemic of L452R-harboring B.1.427/429 variants has been expanding in USA

70

## 71 Graphical Abstract

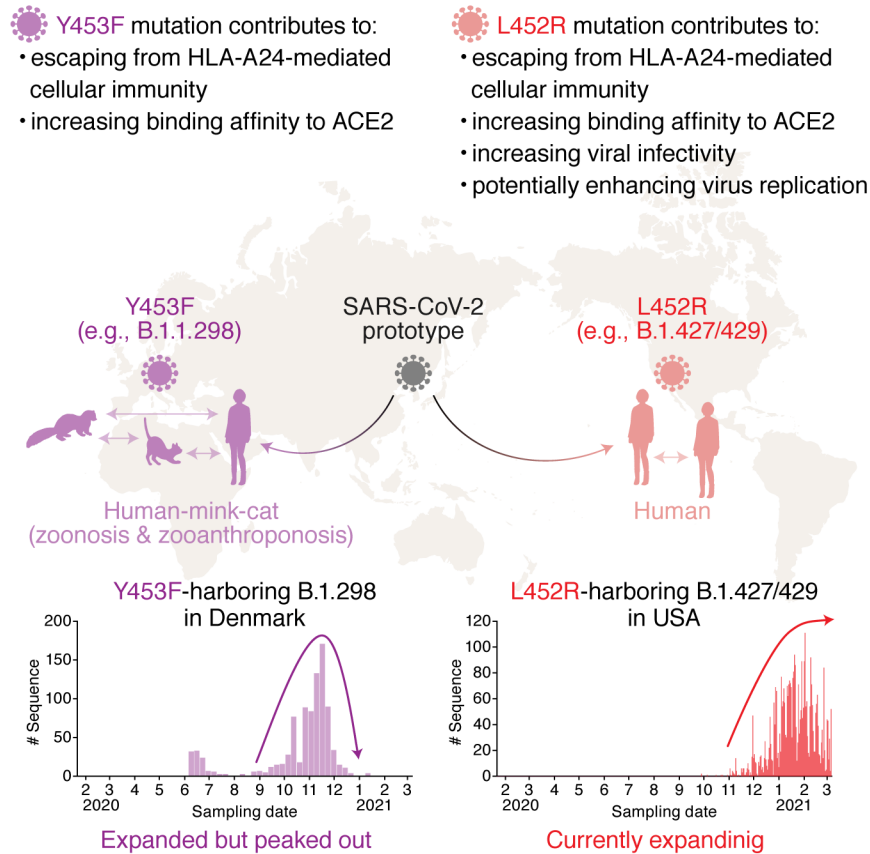

72

73 **Summary** (144/150 words)

74 During the current SARS-CoV-2 pandemic that is devastating the modern societies  
75 worldwide, many variants that naturally acquire multiple mutations have emerged.  
76 Emerging mutations can affect viral properties such as infectivity and immune  
77 resistance. Although the sensitivity of naturally occurring SARS-CoV-2 variants to  
78 humoral immunity has recently been investigated, that to human leukocyte antigen  
79 (HLA)-restricted cellular immunity remains unaddressed. Here we demonstrate that  
80 two recently emerging mutants in the receptor binding domain of the SARS-CoV-2  
81 spike protein, L452R (in B.1.427/429) and Y453F (in B.1.298), can escape from the  
82 HLA-24-restricted cellular immunity. These mutations reinforce the affinity to viral  
83 receptor ACE2, and notably, the L452R mutation increases protein stability, viral  
84 infectivity, and potentially promotes viral replication. Our data suggest that the HLA-  
85 restricted cellular immunity potentially affects the evolution of viral phenotypes, and  
86 the escape from cellular immunity can be a further threat of the SARS-CoV-2  
87 pandemic.

## 88 **Introduction**

89 Coronavirus disease 2019 (COVID-19) is an infectious disease caused by severe  
90 acute respiratory syndrome coronavirus 2 (SARS-CoV-2). Since an unusual  
91 outbreak in Wuhan, Hubei province, China, in December 2019 (Wu et al., 2020; Zhou  
92 et al., 2020), SARS-CoV-2 has rapidly spread all over the world, and as of March  
93 2021, SARS-CoV-2 is an ongoing pandemic: more than one hundred million cases  
94 of infections have been reported worldwide, and more than two million people died  
95 of COVID-19 (WHO, 2020a).

96 During the current pandemic, a variety of SARS-CoV-2 mutants have  
97 emerged and some of them have dominantly spread [reviewed in (Plante et al.,  
98 2021)]. A well-studied SARS-CoV-2 mutant harbors D614G substitution in the spike  
99 (S) protein. Recent studies have revealed that the D614G mutation increases the  
100 SARS-CoV-2 binding affinity to ACE2, the SARS-CoV-2 receptor (Ozono et al.,  
101 2021; Yurkovetskiy et al., 2020; Zhou et al., 2021), infectivity (Ozono et al., 2021;  
102 Yurkovetskiy et al., 2020; Zhou et al., 2021), fitness (Hou et al., 2020; Plante et al.,  
103 2020; Zhou et al., 2021), and transmissibility in the human population (Volz et al.,  
104 2021). However, there is no evidence suggesting that the D614G variant is  
105 associated with viral pathogenicity and lethality (Hou et al., 2020; Korber et al., 2020;  
106 Plante et al., 2020). Additionally, since the fall of 2020, new SARS-CoV-2 variants  
107 such as B.1.1.7 (also known as a variant of concern 202012/01 or 20I/501Y.V1),  
108 B.1.351 (also known as 20H/501Y.V2), and P.1 (also known as 501Y.V3) lineages  
109 emerged in the UK, South Africa, and Brazil, respectively, and have rapidly spread  
110 worldwide (CDC, 2020). At the end of 2020, another lineage, B.1.427/429 (also  
111 known as CAL.20C), has been predominant particularly in California state, the USA  
112 (Deng et al., 2021; Zhang et al., 2021). Moreover, cross-species viral infection can  
113 accelerate the emergence of diversified viruses [reviewed in (Banerjee et al., 2021;  
114 Parrish et al., 2008)]. In the case of SARS-CoV-2, a variety of mammals such as  
115 nonhuman primates (Chandrashekar et al., 2020; Munster et al., 2020; Yu et al.,  
116 2020) and carnivores (Halfmann et al., 2020; Kim et al., 2020; Shi et al., 2020) are  
117 prone to its infection (Damas et al., 2020; Martinez-Hernandez et al., 2020; OIE,  
118 2021). Strikingly, the emergence of a SARS-CoV-2 variant, B.1.298, has likely to be  
119 associated with the outbreak in farmed minks in Denmark (Koopmans, 2021; WHO,  
120 2020b), and phylogenetic analysis has provided evidence of mink-to-human  
121 transmission of SARS-CoV-2 within Danish mink farms (Oude Munnink et al., 2021).  
122 Because newly emerging variants can potentially change viral infectivity,  
123 transmissibility and pathogenicity, deep monitoring of the SARS-CoV-2 strains  
124 circulating globally and locally and evaluating the effects of mutations detected on  
125 virological characteristics are urgent and crucial.

126           The emergence of mutated viruses is mainly due to error-prone viral  
127 replication, and the spread of emerged variants is attributed to the escape from  
128 immune selective pressures [reviewed in (Duffy et al., 2008)]. In fact, several SARS-  
129 CoV-2 mutants can be resistant to the neutralization mediated by the antibodies from  
130 COVID-19 patients (Baum et al., 2020; Chen et al., 2021; Liu et al., 2021c; McCarthy  
131 et al., 2021; Weisblum et al., 2020) as well as those from vaccinated individuals (Liu  
132 et al., 2021b). Although the B.1.1.7 variant is sensitive to convalescent and  
133 vaccinated sera (Collier et al., 2021; Garcia-Beltran et al., 2021; Shen et al., 2021;  
134 Supasa et al., 2021; Wang et al., 2021), the B.1.351 and P.1 variants are relatively  
135 resistant to anti-SARS-CoV-2 humoral immunity (Garcia-Beltran et al., 2021;  
136 Hoffmann et al., 2021a; Wang et al., 2021).

137           In addition to the humoral immunity mediated by neutralizing antibodies,  
138 another protection system against pathogens is the cellular immunity mediated by  
139 cytotoxic T lymphocytes (CTLs) [reviewed in (Fryer et al., 2012; Leslie et al., 2004)].  
140 CTLs recognize the nonself epitopes that are presented on virus-infected cells via  
141 human leukocyte antigen (HLA) class I molecules, and therefore, the CTL-mediated  
142 antiviral immunity is HLA-restricted [reviewed in (La Gruta et al., 2018)]. Recent  
143 studies have reported the HLA-restricted SARS-CoV-2-derived epitopes that can be  
144 recognized by human CTLs (Kared et al., 2021; Kiyotani et al., 2020; Nelde et al.,  
145 2021; Schulien et al., 2021; Wilson et al., 2021). More importantly, Bert et al. have  
146 recently reported that the functionality of virus-specific cellular immunity is inversely  
147 correlated to the COVID-19 severity (Le Bert et al., 2021). Therefore, it is  
148 conceivable to assume that the HLA-restricted CTLs play crucial roles in controlling  
149 SARS-CoV-2 infection and COVID-19 disorders. However, comparing to humoral  
150 immune responses, it remains unclear whether the SARS-CoV-2 variants can  
151 potentially escape from cellular immunity.

152           In this study, we investigate the possibility for the emergence of the SARS-  
153 CoV-2 mutants that can escape from the HLA-restricted cellular immunity. We  
154 demonstrate that at least two naturally occurring substitutions in the receptor binding  
155 motif (RBM; residues 438-506) of the SARS-CoV-2 S protein, L452R and Y453F,  
156 which were identified in the two major variants, B.1.427/429 (L452R) and B.1.1.298  
157 (Y453F), can be resistant to the cellular immunity in the context of HLA-A\*24:02, an  
158 allele of HLA-I. More intriguingly, the L452R and Y453F mutants increase the binding  
159 affinity to ACE2, and the experiments using pseudoviruses show that the L452R  
160 substitution increases viral infectivity. Furthermore, we artificially generate the  
161 SARS-CoV-2 harboring these point mutations by reverse genetics and demonstrate  
162 that the L452R mutants enhance viral replication capacity.

## 163 Results

### 164 Evasion from the HLA-A24-restricted CTL responses by acquiring mutations 165 in the RBM of SARS-CoV-2 S protein

166 We set out to address the possibility of the emergence of the naturally occurring  
167 mutants that can potentially confer the resistance to antigen recognition by HLA-  
168 restricted cellular immunity. A bioinformatic study has suggested that the 9-mer  
169 peptide in the RBM, NYNYLYRLF (we designate this peptide "NF9"), which spans  
170 448-456 in the S protein, can be the potential epitope presented by HLA-A24  
171 (Kiyotani et al., 2020), an HLA-I allele widely distributed all over the world and  
172 particularly predominant in East and Southeast Asian area (**Table S1**). Additionally,  
173 three immunological analyses using COVID-19 convalescents have shown that the  
174 NF9 peptide is an immunodominant epitope presented by HLA-A\*24:02 (Gao et al.,  
175 2021; Hu et al., 2020; Kared et al., 2021). To verify these observations, we obtained  
176 the peripheral blood mononuclear cells (PBMCs) from nine COVID-19  
177 convalescents with HLA-A\*24:02 and stimulated these cells with the NF9 peptide.  
178 As shown in **Figure 1A**, a fraction of CD8<sup>+</sup> T cells upregulated two activation markers,  
179 CD25 and CD137, in response to the stimulation with NF9. In the nine samples of  
180 COVID-19 convalescents with HLA-A\*24:02, the percentage of the CD25<sup>+</sup>CD137<sup>+</sup>  
181 cells in the presence of the NF9 peptide (5.3% in median) was significantly higher  
182 than that in the absence of the NF9 peptide (0.49% in median) (**Figure 1B**;  $P=0.016$   
183 by Wilcoxon signed-rank test). Additionally, the stimulation with the NF9 peptide did  
184 not upregulate CD25 and CD137 in the CD8<sup>+</sup> T cells of three seronegative samples  
185 with HLA-A\*24:02 and the percentage of the CD25<sup>+</sup>CD137<sup>+</sup> cells in seronegative  
186 samples (0.93% in median) was significantly lower than that in COVID-19  
187 convalescent samples (**Figure 1B**;  $P=0.011$  by Mann-Whitney U test). Consistent  
188 with previous reports (Gao et al., 2021; Hu et al., 2020; Kared et al., 2021; Kiyotani  
189 et al., 2020), our data suggest that the NF9 peptide is an immunodominant HLA-  
190 A\*24:02-restricted epitope recognized by the CD8<sup>+</sup> T cells of COVID-19  
191 convalescents in our cohort.

192 We next assessed the profile of cytokine production by the NF9 stimulation.  
193 As shown in **Figure 1C**, the stimulation with the NF9 peptide induced the production  
194 of IFN- $\gamma$ , TNF- $\alpha$  and IL-2 in the CD8<sup>+</sup> T cells of a COVID-19 convalescent. The  
195 analysis using six COVID-19 convalescent samples showed that CD8<sup>+</sup> T cells  
196 produce multiple cytokines in response to the NF9 stimulation (**Figure 1D**),  
197 demonstrating the multifunctional nature of the NF9-specific CD8<sup>+</sup> T cells of COVID-  
198 19 convalescents. Moreover, the cytotoxic potential of the NF9-specific CD8<sup>+</sup> T cells  
199 was assessed by staining with surface CD107a, a degranulation marker (**Figure 1E**).  
200 As shown in **Figure 1F**, the percentage of CD107a<sup>+</sup> cells in the CD8<sup>+</sup> T cells with

201 the NF9 peptide (12.9% in median) was significantly higher than that without the NF9  
202 peptide (0.83% in median) (;  $P=0.031$  by Wilcoxon signed-rank test), suggesting the  
203 cytotoxic potential of the NF9-specific CD8<sup>+</sup> T cells.

204 To assess the presence of naturally occurring variants harboring mutations  
205 in this region (residues 448-456 in the S protein), we analyzed the diversity of SARS-  
206 CoV-2 during the current pandemic. We downloaded 750,243 viral genome  
207 sequences from the global initiative on sharing all influenza data (GISAID) database  
208 (<https://www.gisaid.org>; as of March 15, 2021). The L452R substitution was most  
209 frequent among the sequences analyzed (5,677 sequence), and 1,380 sequences  
210 reported contained the Y453F substitution (**Table 1**). Notably, the B.1.427/429 and  
211 B.1.1.298 lineages (CDC, 2020) in the PANGO lineages ([https://cov-  
212 lineages.org/index.html](https://cov-lineages.org/index.html)) mainly harbor the L452R and Y453F mutations,  
213 respectively (**Figure 1G and Table S2**).

214 To address the possibility that the naturally occurring mutations in the NF9  
215 region, L452R and Y453F, evade the NF9-specific CD8<sup>+</sup> T cells of HLA-A24-positive  
216 COVID-19 convalescents, two NF9 derivatives containing either L452R or Y453F  
217 substitution (NF9-L452R and NF9-Y453F) were prepared and used for the  
218 stimulation experiments. As shown in **Figure S1**, parental NF9 induced IFN- $\gamma$   
219 expression in a dose-dependent manner. In contrast, the induction level of IFN- $\gamma$   
220 expression by the NF9-Y453F derivative was significantly lower than that by parental  
221 NF9, and more intriguingly, the NF9-L452R derivative did not induce IFN- $\gamma$   
222 expression even at the highest concentration tested (10 nM) (**Figure S1**). In the five  
223 HLA-A24-positive COVID-19 convalescent samples, parental NF9 peptide  
224 significantly induced IFN- $\gamma$  expression, while the NF9-L452R and NF9-Y453F  
225 derivatives did not (**Figures 1H and 1I**). Altogether, these results suggest that the  
226 NF9 peptide, which is derived from the RBM of SARS-CoV-2 S protein, is an  
227 immunodominant epitope of HLA-A24, and two naturally occurring mutants, L452R  
228 and Y453F, evade the HLA-A24-restricted cellular immunity.

229

### 230 **Augmentation of the binding affinity to ACE2 by the L452 and Y453 mutations**

231 We next addressed whether the mutations of interest affect the efficacy of virus  
232 infection. Structural analyses have shown that the Y453 and N501 residues in the  
233 RBM are located on the interface between the SARS-CoV-2 RBM and human ACE2  
234 and directly contribute to the binding to human ACE2, while the L452 residue is not  
235 on the RBM-ACE2 interface (Lan et al., 2020; Wang et al., 2020; Zhao et al., 2020)  
236 (**Figure 2A**). To directly assess the effect of these mutations in the RBM on the  
237 binding affinity to ACE2, we prepared the yeasts expressing parental SARS-CoV-2  
238 receptor binding domain RBD (residues 336-528) and its derivatives (L452R, Y453F



239 and N501Y) and performed *in vitro* binding assay using the yeast surface display of  
240 the RBD and soluble ACE2 protein. Consistent with recent studies including ours  
241 ([Supasa et al., 2021](#); [Zahradník et al., 2021b](#)), the N501Y mutation, which is a  
242 common mutation in the B.1.1.7, B.1.351 and P.1 variants [reviewed in ([Plante et al.,](#)  
243 [2021](#))] as well as the Y453F mutation ([Bayarri-Olmos et al., 2021](#); [Zahradník et al.,](#)  
244 [2021b](#)) significantly increased the binding affinity to human ACE2 (**Figures 2B and**  
245 **2C**; RBD parental  $K_D = 2.05 \pm 0.26$  nM; RBD N501Y  $K_D = 0.59 \pm 0.03$  nM; and RBD  
246 Y453F  $K_D = 0.51 \pm 0.06$  nM). We also found that the L452R mutant significantly  
247 increased the binding affinity to human ACE2 (**Figures 2B and 2C**; RBD L452R  $K_D$   
248  $= 1.20 \pm 0.06$  nM). Intriguingly, the L452R mutations increased the surface  
249 expression, which reflects protein stability ([Traxlmayr and Obinger, 2012](#)), while the  
250 Y453F and N501Y mutations decreased (**Figure 2D**).

251

### 252 **Increase of pseudovirus infectivity by the L452R mutation**

253 To directly analyze the effect of the mutations of interest on viral infectivity, we  
254 prepared the HIV-1-based reporter virus pseudotyped with the SARS-CoV-2 S  
255 protein and its mutants and the 293 cells transiently expressing human ACE2 and  
256 TMPRSS2. As shown in **Figure 2E**, although the N501Y mutation faintly affected  
257 viral infectivity in this assay, the L452R mutations significantly increased viral  
258 infectivity compared to parental S protein. In contrast to the yeast display assay  
259 (**Figures 2B and 2C**), the infectivity of the Y453F mutant was significantly lower than  
260 that of parental S protein (**Figure 2E**). Altogether, these findings suggest that the  
261 L452R substitution increases the binding affinity of the SARS-CoV-2 RBD to human  
262 ACE2, protein stability, and viral infectivity. Although the L452 residue is not directly  
263 located at the binding interface (**Figure 2A**), structural analysis and *in silico*  
264 mutagenesis suggested that the L452R substitution can cause a gain of  
265 electrostatics complementarity ([Selzer et al., 2000](#)) (**Figure 2F**). Because the  
266 residue 452 is located close proximity to the negatively charged patch of ACE2  
267 residues (E35, E37, D38), the increase of viral infectivity by the L452R substitution  
268 can be attributed to the increase in the electrostatic interaction with ACE2.

269

### 270 **Promotion of SARS-CoV-2 replication in cell cultures by the L452 mutation**

271 To investigate the effect of the mutations in the RBM on viral replication, we artificially  
272 generated the recombinant SARS-CoV-2 viruses that harbor the mutations of  
273 interest as well as parental recombinant virus by a reverse genetics system ([Torii et](#)  
274 [al., 2021](#)). The nucleotide similarity of SARS-CoV-2 strain WK-521 (GISAID ID:  
275 EPI\_ISL\_408667) ([Matsuyama et al., 2020](#)), the backbone of the artificially  
276 generated recombinant SARS-CoV-2, to strain Wuhan-Hu-1 (GenBank:

277 NC\_045512.2) (Wu et al., 2020) is 99.91% (27 nucleotides difference) and the  
278 sequences encoding the S protein between these two strains are identical, indicating  
279 that the strain WK-521 is a SARS-CoV-2 prototype. We verified the insertions of the  
280 targeted mutations in the generated viruses by direct sequencing (**Figure 3A**) and  
281 performed virus replication assay using these recombinant viruses. As shown in  
282 **Figure 3B**, we revealed that the growth of the L452R mutant in VeroE6/TMPRSS2  
283 cells was significantly higher than that of parental virus. Together with the findings in  
284 the binding assay (**Figures 2B-2D**) and the assay using pseudoviruses (**Figure 2E**),  
285 our results suggest that the L452R mutation potentially increase viral replication.

286

### 287 **Dynamics of the spread of the RBM mutants during the current pandemic**

288 We finally assessed the epidemic dynamics of the naturally occurring variants  
289 containing the substitutions in L452 and Y453. As shown in **Figure 4A and Table**  
290 **S3**, the L452R mutants were mainly found (3,967 sequences) in the B.1.427/B.1.429  
291 lineage that forms a single clade (Deng et al., 2021). Although the L452R mutant  
292 was first detected the B.1.39 lineage in Denmark on March 17, 2020 (GISAID ID:  
293 EPI\_ISL\_429311) (**Table 1**), this variant did not spread. The oldest sequence that  
294 contains the L452R mutation in the B.1.427/B.1.429 lineage was isolated in Quintana  
295 Roo state, Mexico, on July 6, 2020 (GISAID ID: EPI\_ISL\_942929) (**Table 1**), and the  
296 L452R-harboring mutants have been first detected in California state, the USA, on  
297 September 28, 2020 (GISAID ID: EPI\_ISL\_730092 and EPI\_ISL\_730345) (**Figure**  
298 **4B**). The B.1.427/B.1.429 lineage harboring the L452R mutation has started  
299 expanding in California state, the USA, at the beginning of November, 2020 (**Figure**  
300 **4B, top**). In 2021, this lineage has expanded throughout the USA, and currently, is  
301 one of the most predominant lineages in the country (**Figure 4B, bottom and Table**  
302 **S4**).

303 For the Y453F mutation, 1,274 out of the 1,380 mutated sequences belong  
304 to the B.1.1.298 lineage, which has been exclusively detected in Denmark (**Table**  
305 **S3**). The oldest sequence that contains the Y453F mutation in the B.1.1.298 lineage  
306 was isolated from a human in Denmark on April 20, 2020 (GISAID ID:  
307 EPI\_ISL\_714253) (**Figure 4C**). Intriguingly, the B.1.1.298 variants containing either  
308 Y453 or F453 are detected not only in humans but also in minks (**Figure 4D**).

309 The phylogenetic analysis of the whole genome sequences of the B.1.1.298 lineage  
310 SARS-CoV-2 suggested multiple SARS-CoV-2 transmissions between humans to  
311 minks (**Figure S2**). Additionally, the three sequences that contain the Y453F  
312 mutation were isolated from cats in Denmark: the two sequences out of them  
313 (GISAID ID: EPI\_ISL\_683164 and EPI\_ISL\_683166) made a single clade, while the  
314 other one (GISAID ID: EPI\_ISL\_683165) had a distinct origin (**Figure S2**). These

315 results suggest that this SARS-CoV-2 variant has transmitted from humans to cats  
316 multiple times and some of them may spread among Danish cat population. However,  
317 the epidemic of a fraction of the B.1.1.298 lineage containing the Y453F mutation in  
318 Denmark peaked during October to November, 2020, and subsequently, gradually  
319 reduced (**Figure 4D**). The variant containing the Y453F mutation was last collected  
320 in Denmark on January 18, 2021 (GISAID ID: EPI\_ISL\_925998) and it has not been  
321 reported worldwide since then (**Figure 4D**).

## 322 **Discussion**

323 In the present study, we demonstrated that at least two naturally occurring mutations  
324 in the SARS-CoV-2 RBM, L452R and Y453F, escape from an HLA-restricted cellular  
325 immunity and further reinforce the affinity to viral receptor ACE2. We further  
326 demonstrate that the L452R mutation increase the stability of S protein, viral  
327 infectivity and thereby enhances viral replication. Our data suggests that the L452R  
328 mutant escapes from the HLA-A24-restricted cellular immunity and further  
329 strengthens its infectivity.

330 Lines of recent studies have shown the emergence of the SARS-CoV-2  
331 variants that evade the anti-SARS-CoV-2 neutralizing humoral immunity (Baum et  
332 al., 2020; Chen et al., 2021; Garcia-Beltran et al., 2021; Hoffmann et al., 2021a; Liu  
333 et al., 2021b; Liu et al., 2021c; McCarthy et al., 2021; Wang et al., 2021; Weisblum  
334 et al., 2020) and have alerted the risk of the spread of immune escape variants. In  
335 addition to humoral immunity, Zuo et al. have recently reported that functional SARS-  
336 CoV-2-specific cellular immune responses are retained at least 6 months following  
337 infection (Zuo et al., 2021). Le Bert et al. have also shown that functional cellular  
338 immune responses can contribute to controlling the disease progression of COVID-  
339 19 (Le Bert et al., 2021). These observations suggest the importance of cellular  
340 immunity eliciting efficient antiviral effects. However, the possibility of the emergence  
341 of SARS-CoV-2 variants that can evade cellular immunity has not been addressed  
342 yet. Here we demonstrated the L452R and Y453F mutations can contribute to  
343 escaping from an HLA-restricted cellular immunity. In addition to our findings, recent  
344 papers have documented that the L452R (Deng et al., 2021; Li et al., 2020) and  
345 Y453F substitutions (Baum et al., 2020; Hoffmann et al., 2021b) are potentially  
346 resistant to neutralization antibodies, suggesting that these mutants can evade both  
347 humoral and an HLA-restricted cellular immunity. Furthermore, we demonstrated  
348 that the L452R mutation significantly improve the viral replication capacity by  
349 increasing the binding affinity to human ACE2 and protein stability. Altogether, our  
350 findings suggest that the emergence of the variants that can escape from the HLA-  
351 restricted cellular immunity and further enhance viral replication capacity is another  
352 potential risk for deteriorating the COVID-19 pandemic situation.

353 As suggested in previous reports (Koopmans, 2021; Oude Munnink et al.,  
354 2021; WHO, 2020b), our data showed that the B.1.1.298 variant possessing the  
355 Y453F substitution is closely associated with the outbreak in minks in Denmark.  
356 Although it remains unclear whether the emergence of the Y453F mutant potentially  
357 associates with the evasion from the acquired immunity in mink, here we showed  
358 that this mutation can be resistant to the HLA-A24-restricted human cellular immunity.  
359 Because the Y453F mutation did not increase the infection efficacy using mink ACE2,

360 our results suggest that the emergence of this mutant is not due to improving viral  
361 fitness to mink. Nevertheless, the host range of SARS-CoV-2, in terms of the use of  
362 ACE2 molecule for infection receptor, is broad in a variety of mammals (Liu et al.,  
363 2021a; OIE, 2021). More importantly, although murine ACE2 cannot be used for the  
364 infection of prototype SARS-CoV-2, recent studies have revealed that some SARS-  
365 CoV-2 variants including the B.1.351 and P.1 variants gained the ability to use  
366 murine ACE2 for infection and expanded their host range to mice (Li et al., 2021;  
367 Montagutelli et al., 2021). In addition to the evasion from human acquired immunity,  
368 zoonotic and zoonothroponosis SARS-CoV-2 transmissions can contribute to the  
369 accumulation of mutations in the spreading viruses and further impact viral  
370 phenotypes including infectivity, replication efficacy, pathogenicity, transmissibility  
371 and even host range. Therefore, the surveillance on the emergence of novel variants  
372 even in nonhuman mammals and assessing their potentials to adapt to use  
373 nonhuman ACE2 for infection receptor will be critical.

374 In contrast to the B.1.1.298 variant, the B.1.427/429 variant that harbors  
375 L452R substitution seem to emerge during the spread in human population,  
376 particularly in the California state in the USA, one of the hot spots of the SARS-CoV-  
377 2 outbreak in the USA [<https://coronavirus.jhu.edu> (as of April 2, 2021)]. Because  
378 the L452R mutation reinforces the binding affinity to human ACE2 and further  
379 enhances viral replication capacity, this variant might have emerged to improve viral  
380 fitness in humans. Another possibility is that the L452R mutant has emerged to  
381 evade the HLA-A24-restricted cellular immunity: HLA-A24 is relatively predominant  
382 in East Asian individuals (Gonzalez-Galarza et al., 2020), and the proportion of Asian  
383 American in California is highest in the USA (CDC, 2019). For instance, the  
384 proportion of the HLA-A24-positive individuals is ~20% in San Diego (Moore et al.,  
385 2018), a city of California, where more than 270,000 SARS-CoV-2 infection cases  
386 reported so far [<https://coronavirus.jhu.edu> (as of April 2, 2021)]. Therefore, it might  
387 be conceivable to assume that the emergence of the L452R mutant (or the  
388 B.1.427/429 lineage) was driven by the HLA-A24-mediated cellular immunity.

389 In addition to the escape from antiviral acquired immunity, recent studies  
390 have shown that the emerging variants during the current pandemic, particularly the  
391 B.1.1.7 variant, can even increase viral pathogenicity and the mortality of COVID-19  
392 (Challen et al., 2021; Davies et al., 2021; Grint et al., 2021). Importantly, the HLA-  
393 A24 individuals are relatively highly frequent in East and Southeast Asian countries,  
394 such as Japan (Japanese, allele frequency=0.364, n=1,550) and Malaysia  
395 (Malaysian, allele frequency=0.361, n=1,974) (Gonzalez-Galarza et al., 2020)  
396 (Table S1), where both the confirmed cases and the mortality of COVID-19 are  
397 relatively lower than European countries and the USA so far

398 [<https://coronavirus.jhu.edu> (as of April 2, 2021)]. A limitation of this study is that the  
399 effects of the L452 and Y453 substitutions on viral pathogenicity, mortality and  
400 transmissibility remain unaddressed. To fully characterize the virological features of  
401 these mutants, further investigations using animal models and epidemiological data  
402 will be required. Nevertheless, here we showed direct evidence suggesting that the  
403 mutations in the RBM including L452R (in the B.1.427/429 lineage) and Y453F (in  
404 the B1.1.298 lineage) potentially escape from the HLA-A24-restricted cellular  
405 immunity, and further, the L452R mutant increase its replication capacity. Therefore,  
406 these variants, particularly those possessing the L452R mutations, such as the  
407 B.1.427/429 lineage, can be the potential threat for these countries and regions with  
408 predominant HLA-A24 individuals, and deep surveillance and tracing the epidemic  
409 of these variants will be urgently required.

410 **STAR★METHODS**

411 ● KEY RESOURCES TABLE

412 ● RESOURCE AVAILABILITY

413 ○ Lead Contact

414 ○ Materials Availability

415 ○ Data and Code Availability

416 ● EXPERIMENTAL MODEL AND SUBJECT DETAILS

417 ○ Ethics Statement

418 ○ Cell Culture

419 ● METHOD DETAILS

420 ○ Viral Genomes and Phylogenetic Analyses

421 ○ Activation Induced Marker Assay

422 ○ Analysis of Multifunctionality and Cytotoxic Potential of CD8<sup>+</sup> T cells

423 ○ Plasmid Construction

424 ○ Preparation of Soluble Human ACE2

425 ○ Preparation of the Yeast-Based SARS-CoV-2 RBD Expression System

426 ○ Analysis of the Binding Affinity of the SARS-CoV-2 S RBD Variants to

427 Human ACE2 by Yeast Surface Display

428 ○ Pseudovirus Assay

429 ○ Lentiviral Transduction

430 ○ Protein Structure

431 ○ SARS-CoV-2 Reverse Genetics

432 ○ Plaque Assay

433 ○ SARS-CoV-2 Infection

434 ○ Real-time RT-PCR

435 ● QUANTIFICATION AND STATISTICAL ANALYSIS

436

437 **Supplemental Information**

438 Supplemental Information includes 2 figures and 6 tables and can be found with this

439 article online at <http://...>

## 440 **Author Contributions**

441 C.M., M.T., J.Z., T.I., A.S., T.S.T., I.N., H.N., I.K., K.U., and K.S. performed the  
442 experiments.

443 S.T., T.F., G.S., and Y.M. prepared experimental materials.

444 J.Z. and Y.K. performed structural analysis.

445 S.N. performed molecular phylogenetic analysis.

446 A.Y., N.Shimoto, Y.N., R.M., T.T., and N.Sekiya performed clinical analysis and  
447 collected clinical samples.

448 C.M., M.T., J.Z., T.I., A.S., S.N., T.U. and K.S. designed the experiments and  
449 interpreted the results.

450 K.S. wrote the original manuscript.

451 C.M., J.Z., T.I., A.S., S.N, and T.U. modified the manuscript.

452 All authors reviewed and proofread the manuscript.

453 The Genotype to Phenotype Japan (G2P-Japan) consortium contributed to the  
454 project administration.

455

## 456 **Consortia**

457 The Genotype to Phenotype Japan (G2P-Japan) consortium: Mai Fujimi, Hirotake  
458 Furihata, Haruyo Hasebe, Kazuko Kitazato, Naoko Misawa, Mikari Motomura, Akiko  
459 Oide, Sachiko Sakata, Ryo Shimizu, Mai Suganami, Miyoko Takahashi, Jiaqi Wu,  
460 Miyabishara Yokoyama, and Yuan Yue

461

## 462 **Acknowledgments**

463 We would like to thank all members belonging to The Genotype to Phenotype Japan  
464 (G2P-Japan) consortium. We thank Drs. Sho Fujiwara, Kazuaki Fukushima, Masaru  
465 Tanaka and Akifumi Imamura (Tokyo Metropolitan Cancer and Infectious Diseases  
466 Center Komagome Hospital, Japan) for supporting the collection of COVID-19  
467 convalescent samples, Dr. Mizuki Kitamatsu and Mr. Yoshiki Aritsu (Kindai  
468 University, Japan) for supporting the preparation of synthetic peptides, Drs. Hiroyuki  
469 Kishi and Hiroshi Hamana (University of Toyama, Japan) for helpful suggestion, Dr.  
470 Kenzo Tokunaga (National Institute of Infectious Diseases, Japan) for providing pC-  
471 SARS2-S, Dr. Shuetsu Fukushi (National Institute of Infectious Diseases, Japan) for  
472 providing pTarget-human ACE2, and Dr. Masafumi Takiguchi (Kumamoto  
473 University, Japan) for providing C1R-A2402 cells. The super-computing resource  
474 was provided by Human Genome Center at The University of Tokyo and the NIG  
475 supercomputer at ROIS National Institute of Genetics.

476 This study was supported in part by AMED Research Program on Emerging  
477 and Re-emerging Infectious Diseases 20fk0108163 (to A.S.), 20fk0108146 (to K.S.),



478 19fk0108171 (to S.N. and K.S.), 20fk0108270 (to K.S.) and 20fk0108413 (to T.I.,  
479 S.N. and K.S.); AMED Research Program on HIV/AIDS 20fk0410019 (to T.U. and  
480 K.S.), 20fk0410014 (to K.S.) and 21fk0410039 (to K.S.); AMED Japan Program for  
481 Infectious Diseases Research and Infrastructure 20wm0325009 (to A.S.); JST J-  
482 RAPID JPMJJR2007 (to K.S.); JST SICORP (e-ASIA) JPMJSC20U1 (to K.S.); JST  
483 CREST JPMJCR20H6 (to S.N) and JPMJCR20H4 (to K.S); JSPS KAKENHI Grant-  
484 in-Aid for Scientific Research B 18H02662 (to K.S.); JSPS KAKENHI Grant-in-Aid  
485 for Scientific Research on Innovative Areas 16H06429 (to S.N. and K.S.), 16K21723  
486 (to S.N. and K.S.), 17H05823 (to S.N.), 17H05813 (to K.S.), 19H04843 (to S.N.) and  
487 19H04826 (to K.S.); JSPS Fund for the Promotion of Joint International Research  
488 (Fostering Joint International Research) 18KK0447 (to K.S.); JSPS Core-to-Core  
489 Program JPJSCCB20190009 (to T.U.); JSPS Research Fellow DC1 19J20488 (to  
490 I.K.); JSPS Leading Initiative for Excellent Young Researchers (LEADER) (to T.I.);  
491 ONO Medical Research Foundation (to K.S.); Ichiro Kanehara Foundation (to K.S.);  
492 Lotte Foundation (to K.S.); Mochida Memorial Foundation for Medical and  
493 Pharmaceutical Research (to K.S.); Daiichi Sankyo Foundation of Life Science (to  
494 K.S.); Sumitomo Foundation (to K.S.); Uehara Foundation (to K.S.); Takeda Science  
495 Foundation (to C.M., T.I. and K.S.); The Tokyo Biochemical Research Foundation  
496 (to K.S.); Mitsubishi Foundation (to T.I.); Shin-Nihon Foundation of Advanced  
497 Medical Research (to T.I.); An intramural grant from Kumamoto University COVID-  
498 19 Research Projects (AMABIE) (to C.M., T.I. and T.U.); Kumamoto University  
499 International Collaborative Research Grants (to T.U.);  
500 Intercontinental Research and Educational Platform Aiming for Eradication of  
501 HIV/AIDS (to T.I. and T.U.); and 2020 Tokai University School of Medicine Research  
502 Aid (to S.N.). T.S.T and I.N. are the recipients of the doctoral course scholarship  
503 from Japanese Government.

## 504 **References**

- 505 Anderson, B.D., Ikeda, T., Moghadasi, S.A., Martin, A.S., Brown, W.L., and Harris,  
506 R.S. (2018). Natural APOBEC3C variants can elicit differential HIV-1 restriction  
507 activity. *Retrovirology* 15, 78.
- 508 Banerjee, A., Mossman, K., and Baker, M.L. (2021). Zoonthropotic potential of  
509 SARS-CoV-2 and implications of reintroduction into human populations. *Cell Host*  
510 *Microbe* 29, 160-164.
- 511 Baum, A., Fulton, B.O., Wloga, E., Copin, R., Pascal, K.E., Russo, V., Giordano, S.,  
512 Lanza, K., Negron, N., Ni, M., *et al.* (2020). Antibody cocktail to SARS-CoV-2 spike  
513 protein prevents rapid mutational escape seen with individual antibodies. *Science*  
514 369, 1014-1018.
- 515 Bayarri-Olmos, R., Rosbjerg, A., Johnsen, L.B., Helgstrand, C., Bak-Thomsen, T.,  
516 Garred, P., and Skjoedt, M.-O. (2021). The SARS-CoV-2 Y453F mink variant  
517 displays a striking increase in ACE-2 affinity but does not challenge antibody  
518 neutralization. *BioRxiv*, 428834.
- 519 Capella-Gutierrez, S., Silla-Martinez, J.M., and Gabaldon, T. (2009). trimAl: a tool  
520 for automated alignment trimming in large-scale phylogenetic analyses.  
521 *Bioinformatics* 25, 1972-1973.
- 522 CDC (2019). "Birth: final data for 2018".  
523 [https://www.cdc.gov/nchs/data/nvsr/nvsr68/nvsr68\\_13-508.pdf](https://www.cdc.gov/nchs/data/nvsr/nvsr68/nvsr68_13-508.pdf).
- 524 CDC (2020). "Emerging SARS-CoV-2 variants (updated January 28, 2021)".  
525 [https://www.cdc.gov/coronavirus/2019-ncov/more/science-and-research/scientific-](https://www.cdc.gov/coronavirus/2019-ncov/more/science-and-research/scientific-brief-emerging-variants.html)  
526 [brief-emerging-variants.html](https://www.cdc.gov/coronavirus/2019-ncov/more/science-and-research/scientific-brief-emerging-variants.html).
- 527 Challen, R., Brooks-Pollock, E., Read, J.M., Dyson, L., Tsaneva-Atanasova, K., and  
528 Danon, L. (2021). Risk of mortality in patients infected with SARS-CoV-2 variant of  
529 concern 202012/1: matched cohort study. *BMJ* 372, n579.
- 530 Chandrashekar, A., Liu, J., Martinot, A.J., McMahan, K., Mercado, N.B., Peter, L.,  
531 Tostanoski, L.H., Yu, J., Maliga, Z., Nekorchuk, M., *et al.* (2020). SARS-CoV-2  
532 infection protects against rechallenge in rhesus macaques. *Science* 369, 812-817.
- 533 Chen, R.E., Zhang, X., Case, J.B., Winkler, E.S., Liu, Y., VanBlargan, L.A., Liu, J.,  
534 Errico, J.M., Xie, X., Suryadevara, N., *et al.* (2021). Resistance of SARS-CoV-2  
535 variants to neutralization by monoclonal and serum-derived polyclonal antibodies.  
536 *Nat Med*.
- 537 Collier, D.A., De Marco, A., Ferreira, I., Meng, B., Datir, R., Walls, A.C., Kemp, S.S.,  
538 Bassi, J., Pinto, D., Fregni, C.S., *et al.* (2021). Sensitivity of SARS-CoV-2 B.1.1.7 to  
539 mRNA vaccine-elicited antibodies. *Nature*.
- 540 Damas, J., Hughes, G.M., Keough, K.C., Painter, C.A., Persky, N.S., Corbo, M.,  
541 Hiller, M., Koepfli, K.P., Pfenning, A.R., Zhao, H., *et al.* (2020). Broad host range of

542 SARS-CoV-2 predicted by comparative and structural analysis of ACE2 in  
543 vertebrates. *Proc Natl Acad Sci U S A* 117, 22311-22322.

544 Darriba, D., Posada, D., Kozlov, A.M., Stamatakis, A., Morel, B., and Flouri, T. (2020).  
545 ModelTest-NG: A New and Scalable Tool for the Selection of DNA and Protein  
546 Evolutionary Models. *Mol Biol Evol* 37, 291-294.

547 Davies, N.G., Jarvis, C.I., Group, C.C.-W., Edmunds, W.J., Jewell, N.P., Diaz-Ordaz,  
548 K., and Keogh, R.H. (2021). Increased mortality in community-tested cases of  
549 SARS-CoV-2 lineage B.1.1.7. *Nature*.

550 Deng, X., Garcia-Knight, M.A., Khalid, M.M., Servellita, V., Wang, C., Morris, M.K.,  
551 Sotomayor-González, A., Glasner, D.R., Reyes, K.R., Gliwa, A.S., *et al.* (2021).  
552 Transmission, infectivity, and antibody neutralization of an emerging SARS-CoV-2  
553 variant in California carrying a L452R spike protein mutation. *MedRxiv*, 21252647.

554 Duffy, S., Shackelton, L.A., and Holmes, E.C. (2008). Rates of evolutionary change  
555 in viruses: patterns and determinants. *Nat Rev Genet* 9, 267-276.

556 Fryer, H.R., Frater, J., Duda, A., Palmer, D., Phillips, R.E., and McLean, A.R. (2012).  
557 Cytotoxic T-lymphocyte escape mutations identified by HLA association favor those  
558 which escape and revert rapidly. *J Virol* 86, 8568-8580.

559 Fukushi, S., Mizutani, T., Sakai, K., Saijo, M., Taguchi, F., Yokoyama, M., Kurane,  
560 I., and Morikawa, S. (2007). Amino acid substitutions in the s2 region enhance  
561 severe acute respiratory syndrome coronavirus infectivity in rat angiotensin-  
562 converting enzyme 2-expressing cells. *J Virol* 81, 10831-10834.

563 Gao, A., Chen, Z., Amitai, A., Doelger, J., Mallajosyula, V., Sundquist, E., Segal,  
564 F.P., Carrington, M., Davis, M.M., Streeck, H., *et al.* (2021). Learning from HIV-1 to  
565 predict the immunogenicity of T cell epitopes in SARS-COV-2. *iScience*, 102311.

566 Garcia-Beltran, W.F., Lam, E.C., St Denis, K., Nitido, A.D., Garcia, Z.H., Hauser,  
567 B.M., Feldman, J., Pavlovic, M.N., Gregory, D.J., Poznansky, M.C., *et al.* (2021).  
568 Multiple SARS-CoV-2 variants escape neutralization by vaccine-induced humoral  
569 immunity. *Cell*.

570 Gonzalez-Galarza, F.F., McCabe, A., Santos, E., Jones, J., Takeshita, L., Ortega-  
571 Rivera, N.D., Cid-Pavon, G.M.D., Ramsbottom, K., Ghattaoraya, G., Alfievic, A., *et*  
572 *al.* (2020). Allele frequency net database (AFND) 2020 update: gold-standard data  
573 classification, open access genotype data and new query tools. *Nucleic Acids Res*  
574 48, D783-D788.

575 Grint, D.J., Wing, K., Williamson, E., McDonald, H.I., Bhaskaran, K., Evans, D.,  
576 Evans, S.J., Walker, A.J., Hickman, G., Nightingale, E., *et al.* (2021). Case fatality  
577 risk of the SARS-CoV-2 variant of concern B.1.1.7 in England. *MedRxiv*, 21252528.

578 Halfmann, P.J., Hatta, M., Chiba, S., Maemura, T., Fan, S., Takeda, M., Kinoshita,  
579 N., Hattori, S.I., Sakai-Tagawa, Y., Iwatsuki-Horimoto, K., *et al.* (2020). Transmission

580 of SARS-CoV-2 in Domestic Cats. *N Engl J Med* 383, 592-594.

581 Hoffmann, M., Arora, P., Groß, R., Seidel, A., Hörnich, B.F., Hahn, A.S., Krüger, N.,  
582 Graichen, L., Hofmann-Winkler, H., Kempf, A., *et al.* (2021a). SARS-CoV-2 variants  
583 B.1.351 and P.1 escape from neutralizing antibodies. *Cell Pre-proof*.

584 Hoffmann, M., Zhang, L., Krüger, N., Graichen, L., Kleine-Weber, H., Hofmann-  
585 Winkler, H., Kempf, A., Nessler, S., Riggert, J., Winkler, M.S., *et al.* (2021b). SARS-  
586 CoV-2 mutations acquired in mink reduce antibody-mediated neutralization. *BioRxiv*,  
587 430998.

588 Hou, Y.J., Chiba, S., Halfmann, P., Ehre, C., Kuroda, M., Dinnon, K.H., 3rd, Leist,  
589 S.R., Schafer, A., Nakajima, N., Takahashi, K., *et al.* (2020). SARS-CoV-2 D614G  
590 variant exhibits efficient replication *ex vivo* and transmission *in vivo*. *Science* 370,  
591 1464-1468.

592 Hu, C., Shen, M., Han, X., Chen, Q., Li, L., Chen, S., Zhang, J., Gao, F., Wang, W.,  
593 Wang, Y., *et al.* (2020). Identification of cross-reactive CD8<sup>+</sup> T cell receptors with  
594 high functional avidity to a SARS-CoV-2 immunodominant epitope and its natural  
595 mutant variants. *BioRxiv*, 364729.

596 Ikeda, T., Molan, A.M., Jarvis, M.C., Carpenter, M.A., Salamango, D.J., Brown, W.L.,  
597 and Harris, R.S. (2019). HIV-1 restriction by endogenous APOBEC3G in the myeloid  
598 cell line THP-1. *J Gen Virol* 100, 1140-1152.

599 Karaki, S., Kariyone, A., Kato, N., Kano, K., Iwakura, Y., and Takiguchi, M. (1993).  
600 HLA-B51 transgenic mice as recipients for production of polymorphic HLA-A, B-  
601 specific antibodies. *Immunogenetics* 37, 139-142.

602 Kared, H., Redd, A.D., Bloch, E.M., Bonny, T.S., Sumatoh, H., Kairi, F., Carbajo, D.,  
603 Abel, B., Newell, E.W., Bettinotti, M.P., *et al.* (2021). SARS-CoV-2-specific CD8<sup>+</sup> T  
604 cell responses in convalescent COVID-19 individuals. *J Clin Invest* 131.

605 Katoh, K., and Standley, D.M. (2013). MAFFT multiple sequence alignment software  
606 version 7: improvements in performance and usability. *Mol Biol Evol* 30, 772-780.

607 Kim, Y.I., Kim, S.G., Kim, S.M., Kim, E.H., Park, S.J., Yu, K.M., Chang, J.H., Kim,  
608 E.J., Lee, S., Casel, M.A.B., *et al.* (2020). Infection and Rapid Transmission of  
609 SARS-CoV-2 in Ferrets. *Cell Host Microbe* 27, 704-709 e702.

610 Kiyotani, K., Toyoshima, Y., Nemoto, K., and Nakamura, Y. (2020). Bioinformatic  
611 prediction of potential T cell epitopes for SARS-Cov-2. *J Hum Genet* 65, 569-575.

612 Koopmans, M. (2021). SARS-CoV-2 and the human-animal interface: outbreaks on  
613 mink farms. *Lancet Infect Dis* 21, 18-19.

614 Korber, B., Fischer, W.M., Gnanakaran, S., Yoon, H., Theiler, J., Abfalterer, W.,  
615 Hengartner, N., Giorgi, E.E., Bhattacharya, T., Foley, B., *et al.* (2020). Tracking  
616 Changes in SARS-CoV-2 Spike: Evidence that D614G Increases Infectivity of the  
617 COVID-19 Virus. *Cell* 182, 812-827.

- 618 Kozlov, A.M., Darriba, D., Flouri, T., Morel, B., and Stamatakis, A. (2019). RAXML-  
619 NG: a fast, scalable and user-friendly tool for maximum likelihood phylogenetic  
620 inference. *Bioinformatics* 35, 4453-4455.
- 621 La Gruta, N.L., Gras, S., Daley, S.R., Thomas, P.G., and Rossjohn, J. (2018).  
622 Understanding the drivers of MHC restriction of T cell receptors. *Nat Rev Immunol*  
623 18, 467-478.
- 624 Lan, J., Ge, J., Yu, J., Shan, S., Zhou, H., Fan, S., Zhang, Q., Shi, X., Wang, Q.,  
625 Zhang, L., *et al.* (2020). Structure of the SARS-CoV-2 spike receptor-binding domain  
626 bound to the ACE2 receptor. *Nature* 581, 215-220.
- 627 Le Bert, N., Clapham, H.E., Tan, A.T., Chia, W.N., Tham, C.Y.L., Lim, J.M.,  
628 Kunasegaran, K., Tan, L.W.L., Dutertre, C.A., Shankar, N., *et al.* (2021). Highly  
629 functional virus-specific cellular immune response in asymptomatic SARS-CoV-2  
630 infection. *J Exp Med* 218.
- 631 Leslie, A.J., Pfafferott, K.J., Chetty, P., Draenert, R., Addo, M.M., Feeney, M., Tang,  
632 Y., Holmes, E.C., Allen, T., Prado, J.G., *et al.* (2004). HIV evolution: CTL escape  
633 mutation and reversion after transmission. *Nat Med* 10, 282-289.
- 634 Li, Q., Nie, J., Wu, J., Zhang, L., Ding, R., Wang, H., Zhang, Y., Li, T., Liu, S., Zhang,  
635 M., *et al.* (2021). SARS-CoV-2 501Y.V2 variants lack higher infectivity but do have  
636 immune escape. *Cell* 184, 1-10 (pre-proof).
- 637 Li, Q., Wu, J., Nie, J., Zhang, L., Hao, H., Liu, S., Zhao, C., Zhang, Q., Liu, H., Nie,  
638 L., *et al.* (2020). The impact of mutations in SARS-CoV-2 spike on viral infectivity  
639 and antigenicity. *Cell* 182, 1284-1294 e1289.
- 640 Liu, Y., Hu, G., Wang, Y., Ren, W., Zhao, X., Ji, F., Zhu, Y., Feng, F., Gong, M., Ju,  
641 X., *et al.* (2021a). Functional and genetic analysis of viral receptor ACE2 orthologs  
642 reveals a broad potential host range of SARS-CoV-2. *Proc Natl Acad Sci U S A* 118.
- 643 Liu, Y., Liu, J., Xia, H., Zhang, X., Fontes-Garfias, C.R., Swanson, K.A., Cai, H.,  
644 Sarkar, R., Chen, W., Cutler, M., *et al.* (2021b). Neutralizing Activity of BNT162b2-  
645 Elicited Serum. *N Engl J Med*.
- 646 Liu, Z., VanBlargan, L.A., Bloyet, L.M., Rothlauf, P.W., Chen, R.E., Stumpf, S., Zhao,  
647 H., Errico, J.M., Theel, E.S., Liebeskind, M.J., *et al.* (2021c). Identification of SARS-  
648 CoV-2 spike mutations that attenuate monoclonal and serum antibody neutralization.  
649 *Cell Host Microbe* 29, 477-488 e474.
- 650 Martinez-Hernandez, F., Isaak-Delgado, A.B., Alfonso-Toledo, J.A., Munoz-Garcia,  
651 C.I., Villalobos, G., Arechiga-Ceballos, N., and Rendon-Franco, E. (2020).  
652 Assessing the SARS-CoV-2 threat to wildlife: Potential risk to a broad range of  
653 mammals. *Perspect Ecol Conserv* 18, 223-234.
- 654 Matsuyama, S., Nao, N., Shirato, K., Kawase, M., Saito, S., Takayama, I., Nagata,  
655 N., Sekizuka, T., Katoh, H., Kato, F., *et al.* (2020). Enhanced isolation of SARS-CoV-

656 2 by TMPRSS2-expressing cells. *Proc Natl Acad Sci U S A* 117, 7001-7003.  
657 McCarthy, K.R., Rennick, L.J., Nambulli, S., Robinson-McCarthy, L.R., Bain, W.G.,  
658 Haidar, G., and Duprex, W.P. (2021). Recurrent deletions in the SARS-CoV-2 spike  
659 glycoprotein drive antibody escape. *Science* 371, 1139-1142.  
660 Montagnetelli, X., Prot, M., Levillayer, L., Salazar, E.B., Jouvion, G., Conquet, L.,  
661 Donati, F., Albert, M., Gambaro, F., Behillil, S., *et al.* (2021). The B1.351 and P.1  
662 variants extend SARS-CoV-2 host range to mice. *BioRxiv*, 436013.  
663 Moore, E., Grifoni, A., Weiskopf, D., Schulten, V., Arlehamn, C.S.L., Angelo, M.,  
664 Pham, J., Leary, S., Sidney, J., Broide, D., *et al.* (2018). Sequence-based HLA-A, B,  
665 C, DP, DQ, and DR typing of 496 adults from San Diego, California, USA. *Hum*  
666 *Immunol* 79, 821-822.  
667 Munster, V.J., Feldmann, F., Williamson, B.N., van Doremalen, N., Perez-Perez, L.,  
668 Schulz, J., Meade-White, K., Okumura, A., Callison, J., Brumbaugh, B., *et al.* (2020).  
669 Respiratory disease in rhesus macaques inoculated with SARS-CoV-2. *Nature* 585,  
670 268-272.  
671 Naldini, L., Blomer, U., Gallay, P., Ory, D., Mulligan, R., Gage, F.H., Verma, I.M.,  
672 and Trono, D. (1996). In vivo gene delivery and stable transduction of nondividing  
673 cells by a lentiviral vector. *Science* 272, 263-267.  
674 Nelde, A., Bilich, T., Heitmann, J.S., Maringer, Y., Salih, H.R., Roerden, M., Lubke,  
675 M., Bauer, J., Rieth, J., Wacker, M., *et al.* (2021). SARS-CoV-2-derived peptides  
676 define heterologous and COVID-19-induced T cell recognition. *Nat Immunol* 22, 74-  
677 85.  
678 Niwa, H., Yamamura, K., and Miyazaki, J. (1991). Efficient selection for high-  
679 expression transfectants with a novel eukaryotic vector. *Gene* 108, 193-199.  
680 OIE (2021). "Infection with SARS-CoV-2 in animals (January 2021)".  
681 [https://www.oie.int/fileadmin/Home/MM/EN\\_Factsheet\\_SARS-CoV-2.pdf](https://www.oie.int/fileadmin/Home/MM/EN_Factsheet_SARS-CoV-2.pdf).  
682 Oude Munnink, B.B., Sikkema, R.S., Nieuwenhuijse, D.F., Molenaar, R.J., Munger,  
683 E., Molenkamp, R., van der Spek, A., Tolsma, P., Rietveld, A., Brouwer, M., *et al.*  
684 (2021). Transmission of SARS-CoV-2 on mink farms between humans and mink and  
685 back to humans. *Science* 371, 172-177.  
686 Ozono, S., Zhang, Y., Ode, H., Sano, K., Tan, T.S., Imai, K., Miyoshi, K., Kishigami,  
687 S., Ueno, T., Iwatani, Y., *et al.* (2021). SARS-CoV-2 D614G spike mutation increases  
688 entry efficiency with enhanced ACE2-binding affinity. *Nat Commun* 12, 848.  
689 Ozono, S., Zhang, Y., Tobiume, M., Kishigami, S., and Tokunaga, K. (2020). Super-  
690 rapid quantitation of the production of HIV-1 harboring a luminescent peptide tag. *J*  
691 *Biol Chem* 295, 13023-13030.  
692 Parrish, C.R., Holmes, E.C., Morens, D.M., Park, E.C., Burke, D.S., Calisher, C.H.,  
693 Laughlin, C.A., Saif, L.J., and Daszak, P. (2008). Cross-species virus transmission

694 and the emergence of new epidemic diseases. *Microbiol Mol Biol Rev* 72, 457-470.  
695 Peleg, Y., and Unger, T. (2014). Application of the Restriction-Free (RF) cloning for  
696 multicomponents assembly. *Methods Mol Biol* 1116, 73-87.  
697 Pettersen, E.F., Goddard, T.D., Huang, C.C., Couch, G.S., Greenblatt, D.M., Meng,  
698 E.C., and Ferrin, T.E. (2004). UCSF Chimera—A visualization system for exploratory  
699 research and analysis. *J Comp Chem* 25, 1605-1612.  
700 Plante, J.A., Liu, Y., Liu, J., Xia, H., Johnson, B.A., Lokugamage, K.G., Zhang, X.,  
701 Muruato, A.E., Zou, J., Fontes-Garfias, C.R., *et al.* (2020). Spike mutation D614G  
702 alters SARS-CoV-2 fitness. *Nature*.  
703 Plante, J.A., Mitchell, B.M., Plante, K.S., Debbink, K., Weaver, S.C., and Menachery,  
704 V.D. (2021). The Variant Gambit: COVID's Next Move. *Cell Pre-proof*.  
705 Rambaut, A., Holmes, E.C., O'Toole, A., Hill, V., McCrone, J.T., Ruis, C., du Plessis,  
706 L., and Pybus, O.G. (2020). A dynamic nomenclature proposal for SARS-CoV-2  
707 lineages to assist genomic epidemiology. *Nat Microbiol* 5, 1403-1407.  
708 Rausch, T., Fritz, M.H., Untergasser, A., and Benes, V. (2020). Tracy: basecalling,  
709 alignment, assembly and deconvolution of sanger chromatogram trace files. *BMC*  
710 *Genomics* 21, 230.  
711 Schulien, I., Kemming, J., Oberhardt, V., Wild, K., Seidel, L.M., Killmer, S., Sagar,  
712 Daul, F., Salvat Lago, M., Decker, A., *et al.* (2021). Characterization of pre-existing  
713 and induced SARS-CoV-2-specific CD8(+) T cells. *Nat Med* 27, 78-85.  
714 Selzer, T., Albeck, S., and Schreiber, G. (2000). Rational design of faster associating  
715 and tighter binding protein complexes. *Nat Struct Biol* 7, 537-541.  
716 Shema Mugisha, C., Vuong, H.R., Puray-Chavez, M., Bailey, A.L., Fox, J.M., Chen,  
717 R.E., Wessel, A.W., Scott, J.M., Harastani, H.H., Boon, A.C.M., *et al.* (2020). A  
718 Simplified Quantitative Real-Time PCR Assay for Monitoring SARS-CoV-2 Growth  
719 in Cell Culture. *mSphere* 5.  
720 Shen, X., Tang, H., McDanal, C., Wagh, K., Fischer, W., Theiler, J., Yoon, H., Li, D.,  
721 Haynes, B.F., Sanders, K.O., *et al.* (2021). SARS-CoV-2 variant B.1.1.7 is  
722 susceptible to neutralizing antibodies elicited by ancestral spike vaccines. *Cell Host*  
723 *Microbe*.  
724 Shi, J., Wen, Z., Zhong, G., Yang, H., Wang, C., Huang, B., Liu, R., He, X., Shuai,  
725 L., Sun, Z., *et al.* (2020). Susceptibility of ferrets, cats, dogs, and other domesticated  
726 animals to SARS-coronavirus 2. *Science* 368, 1016-1020.  
727 Supasa, P., Zhou, D., Dejnirattisai, W., Liu, C., Mentzer, A.J., Ginn, H.M., Zhao, Y.,  
728 Duyvesteyn, H.M.E., Nutalai, R., Tuekprakhon, A., *et al.* (2021). Reduced  
729 neutralization of SARS-CoV-2 B.1.1.7 variant by convalescent and vaccine sera. *Cell*  
730 184, 1-11 (pre-proof).  
731 Torii, S., Ono, C., Suzuki, R., Morioka, Y., Anzai, I., Fauzyah, Y., Maeda, Y., Kamitani,

- 732 W., Fukuhara, T., and Matsuura, Y. (2021). Establishment of a reverse genetics  
733 system for SARS-CoV-2 using circular polymerase extension reaction. *Cell Rep Pre-*  
734 *proof*.
- 735 Traxlmayr, M.W., and Obinger, C. (2012). Directed evolution of proteins for  
736 increased stability and expression using yeast display. *Arch Biochem Biophys* 526,  
737 174-180.
- 738 Volz, E., Hill, V., McCrone, J.T., Price, A., Jorgensen, D., O'Toole, A., Southgate, J.,  
739 Johnson, R., Jackson, B., Nascimento, F.F., *et al.* (2021). Evaluating the Effects of  
740 SARS-CoV-2 Spike Mutation D614G on Transmissibility and Pathogenicity. *Cell* 184,  
741 64-75 e11.
- 742 Wang, P., Nair, M.S., Liu, L., Iketani, S., Luo, Y., Guo, Y., Wang, M., Yu, J., Zhang,  
743 B., Kwong, P.D., *et al.* (2021). Antibody Resistance of SARS-CoV-2 Variants B.1.351  
744 and B.1.1.7. *Nature*.
- 745 Wang, Q., Zhang, Y., Wu, L., Niu, S., Song, C., Zhang, Z., Lu, G., Qiao, C., Hu, Y.,  
746 Yuen, K.Y., *et al.* (2020). Structural and Functional Basis of SARS-CoV-2 Entry by  
747 Using Human ACE2. *Cell* 181, 894-904 e899.
- 748 Weisblum, Y., Schmidt, F., Zhang, F., DaSilva, J., Poston, D., Lorenzi, J.C.,  
749 Muecksch, F., Rutkowska, M., Hoffmann, H.H., Michailidis, E., *et al.* (2020). Escape  
750 from neutralizing antibodies by SARS-CoV-2 spike protein variants. *Elife* 9.
- 751 WHO (2020a). "Coronavirus disease 2019".  
752 <https://www.who.int/emergencies/diseases/novel-coronavirus-2019>.
- 753 WHO (2020b). "SARS-CoV-2 mink-associated variant strain – Denmark (November  
754 6, 2020)". [https://www.who.int/csr/don/06-november-2020-mink-associated-sars-](https://www.who.int/csr/don/06-november-2020-mink-associated-sars-cov2-denmark/en/)  
755 [cov2-denmark/en/](https://www.who.int/csr/don/06-november-2020-mink-associated-sars-cov2-denmark/en/).
- 756 Wilson, E.A., Hirneise, G., Singharoy, A., and Anderson, K.S. (2021). Total predicted  
757 MHC-I epitope load is inversely associated with population mortality from SARS-  
758 CoV-2. *Cell Rep Med* 2, 100221.
- 759 Wolf, M., Kuball, J., Ho, W.Y., Nguyen, H., Manley, T.J., Bleakley, M., and  
760 Greenberg, P.D. (2007). Activation-induced expression of CD137 permits detection,  
761 isolation, and expansion of the full repertoire of CD8+ T cells responding to antigen  
762 without requiring knowledge of epitope specificities. *Blood* 110, 201-210.
- 763 Wu, F., Zhao, S., Yu, B., Chen, Y.M., Wang, W., Song, Z.G., Hu, Y., Tao, Z.W., Tian,  
764 J.H., Pei, Y.Y., *et al.* (2020). A new coronavirus associated with human respiratory  
765 disease in China. *Nature* 579, 265-269.
- 766 Yan, R., Zhang, Y., Li, Y., Xia, L., Guo, Y., and Zhou, Q. (2020). Structural basis for  
767 the recognition of SARS-CoV-2 by full-length human ACE2. *Science* 367, 1444-1448.
- 768 Yu, J., Tostanoski, L.H., Peter, L., Mercado, N.B., McMahan, K., Mahrokhian, S.H.,  
769 Nkolola, J.P., Liu, J., Li, Z., Chandrashekar, A., *et al.* (2020). DNA vaccine protection



770 against SARS-CoV-2 in rhesus macaques. *Science* 369, 806-811.  
771 Yurkovetskiy, L., Wang, X., Pascal, K.E., Tomkins-Tinch, C., Nyalile, T.P., Wang, Y.,  
772 Baum, A., Diehl, W.E., Dauphin, A., Carbone, C., *et al.* (2020). Structural and  
773 Functional Analysis of the D614G SARS-CoV-2 Spike Protein Variant. *Cell* 183, 739-  
774 751 e738.  
775 Zahradník, J., Dey, D., Marciano, S., and Schreiber, G. (2021a). An enhanced yeast  
776 display platform demonstrates the binding plasticity under various selection  
777 pressures. *BioRxiv*, 423176.  
778 Zahradník, J., Marciano, S., Shemesh, M., Zoler, E., Chiaravalli, J., Meyer, B.,  
779 Rudich, Y., Dym, O., Elad, N., and Schreiber, G. (2021b). SARS-CoV-2 RBD in vitro  
780 evolution follows contagious mutation spread  
781 yet generates an able infection inhibitor. *BioRxiv*, 425392.  
782 Zhang, W., Davis, B.D., Chen, S.S., Sincuir Martinez, J.M., Plummer, J.T., and Vail,  
783 E. (2021). Emergence of a novel SARS-CoV-2 variant in Southern California. *JAMA*,  
784 e211612.  
785 Zhao, X., Chen, D., Szabla, R., Zheng, M., Li, G., Du, P., Zheng, S., Li, X., Song, C.,  
786 Li, R., *et al.* (2020). Broad and Differential Animal Angiotensin-Converting Enzyme  
787 2 Receptor Usage by SARS-CoV-2. *J Virol* 94.  
788 Zhou, B., Thi Nhu Thao, T., Hoffmann, D., Taddeo, A., Ebert, N., Labroussaa, F.,  
789 Pohlmann, A., King, J., Steiner, S., Kelly, J.N., *et al.* (2021). SARS-CoV-2 spike  
790 D614G change enhances replication and transmission. *Nature*.  
791 Zhou, P., Yang, X.L., Wang, X.G., Hu, B., Zhang, L., Zhang, W., Si, H.R., Zhu, Y.,  
792 Li, B., Huang, C.L., *et al.* (2020). A pneumonia outbreak associated with a new  
793 coronavirus of probable bat origin. *Nature* 579, 270-273.  
794 Zuo, J., Dowell, A.C., Pearce, H., Verma, K., Long, H.M., Begum, J., Aiano, F., Amin-  
795 Chowdhury, Z., Hallis, B., Stapley, L., *et al.* (2021). Robust SARS-CoV-2-specific T  
796 cell immunity is maintained at 6 months following primary infection. *Nat Immunol*.  
797

798 **Figures & figure legends**  
799

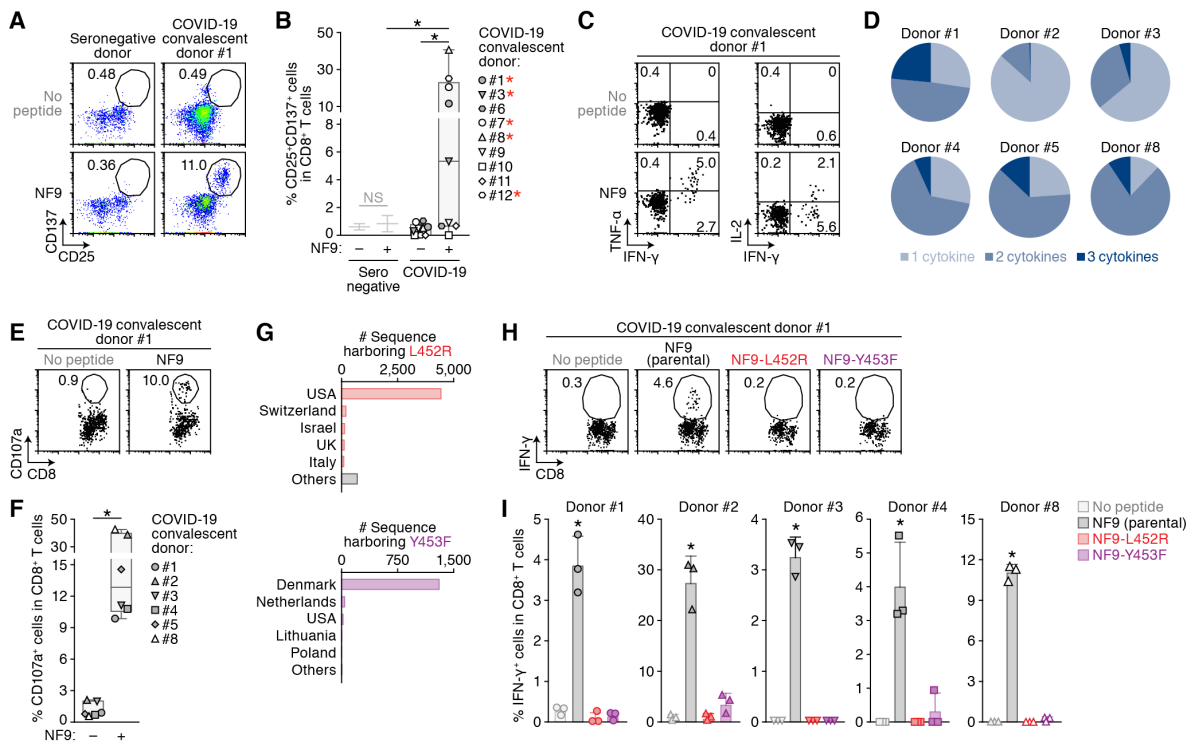

800

801 **Figure 1. Escape of the two naturally occurring SARS-CoV-2 mutations from**  
802 **the S RBM-specific CD8<sup>+</sup> T cells.**

803 (A and B) Detection of the HLA-A24-restricted NF9-specific CTLs. The HLA-  
804 A\*24:02-positive CTL lines of 3 seronegative donors and 9 COVID-19 convalescents  
805 were stimulated with or without 1  $\mu$ M NF9 peptide (NYNYLYRLF, residues 448-456  
806 of the SARS-CoV-2 S protein). Representative FACS plots showing the surface  
807 expression of CD25 and CD137 in the CD8<sup>+</sup> T cell subset (i.e., CD3<sup>+</sup>CD8<sup>+</sup> cells) of  
808 a seronegative donor (left) and a COVID-19 convalescent donor #1 (right) (A) and  
809 the median of the percentage of CD25<sup>+</sup>CD137<sup>+</sup> cells in CD8<sup>+</sup> T cells (B) are shown.  
810 In B, the COVID-19 convalescent samples >3 SD of the median of NF9-stimulated  
811 seronegative samples are indicated with red asterisks.

812 (C and D) Multifunctionality of the HLA-A24-restricted NF9-specific CTLs. The HLA-  
813 A\*24:02-positive CTL lines of 6 COVID-19 convalescents were stimulated with or  
814 without 10 nM NF9 peptide. Representative FACS plots showing the intracellular  
815 expression of IFN- $\gamma$ , TNF- $\alpha$  and IL-2 in the CD8<sup>+</sup> T cell subset of a COVID-19  
816 convalescent (donor #1) (C) and the pie charts showing the proportion of cytokine  
817 positive cells in each convalescent sample (D) are shown.

818 (E and F) Potential killing activity of the HLA-A24-restricted NF9-specific CTLs. The  
819 HLA-A\*24:02-positive CTL lines of 6 COVID-19 convalescents were stimulated with

820 the C1R-A2402 cells pulsed with or without 10 nM NF9 peptide. Representative  
821 FACS plots showing the surface expression of CD107a in the CD8<sup>+</sup> T cell subset of  
822 a COVID-19 convalescent (donor #1) (**E**) and the median of the percentage of  
823 CD107a<sup>+</sup> cells in CD8<sup>+</sup> T cells (**F**) are shown.

824 (**G**) Distribution of the L452R and Y453F mutants during the current pandemic. The  
825 top 5 countries where the variants harboring the L452R (top) and Y453F (bottom)  
826 mutations are shown. The raw data are summarized in **Table S2**.

827 (**H and I**) Mutations escaped from the HLA-A24-restricted NF9-specific CTLs. The  
828 HLA-A\*24:02-positive CTL lines of 5 COVID-19 convalescents were stimulated with  
829 1 nM NF9 peptide or its derivatives: NF9-L452R (NYNYRYR<sub>L</sub>F) and NF9-Y453F  
830 (NYNYLFR<sub>L</sub>F). Representative FACS plots showing the intracellular expression of  
831 IFN-γ in the CD8<sup>+</sup> T cell subset of a COVID-19 convalescent (donor #1) (**H**) and the  
832 mean of the percentage of IFN-γ<sup>+</sup> cells in CD8<sup>+</sup> T cells (**I**) are shown.

833 In **A, E and H**, the numbers in the FACS plot represent the percentage of gated cells  
834 in CD8<sup>+</sup> T cells. In **C**, the number represents the percentage of the cells in each  
835 quadrant.

836 In **B**, a statistically significant difference (\*,  $P < 0.05$ ) between SARS-CoV-2  
837 seronegative and COVID-19 convalescent samples is determined by Mann-Whitney  
838 U test, and a statistically significant difference (\*,  $P < 0.05$ ) between with and without  
839 NF9 peptide in COVID-19 convalescent samples is determined by Wilcoxon signed-  
840 rank test.

841 In **F**, each symbol of the COVID-19 convalescent data represents the mean of  
842 technical triplicate. Statistically significant differences (\*,  $P < 0.05$ ) between with and  
843 without NF9 peptide in COVID-19 convalescent samples are determined by  
844 Wilcoxon signed-rank test.

845 In **I**, the assay was performed in triplicate, and the means are shown with SD.  
846 Statistically significant differences (\*,  $P < 0.05$ ) versus "no are determined by ANOVA  
847 with multiple comparisons by Bonferroni correction.

848 See also **Figure S1** and **Tables S1 and S2**.

849

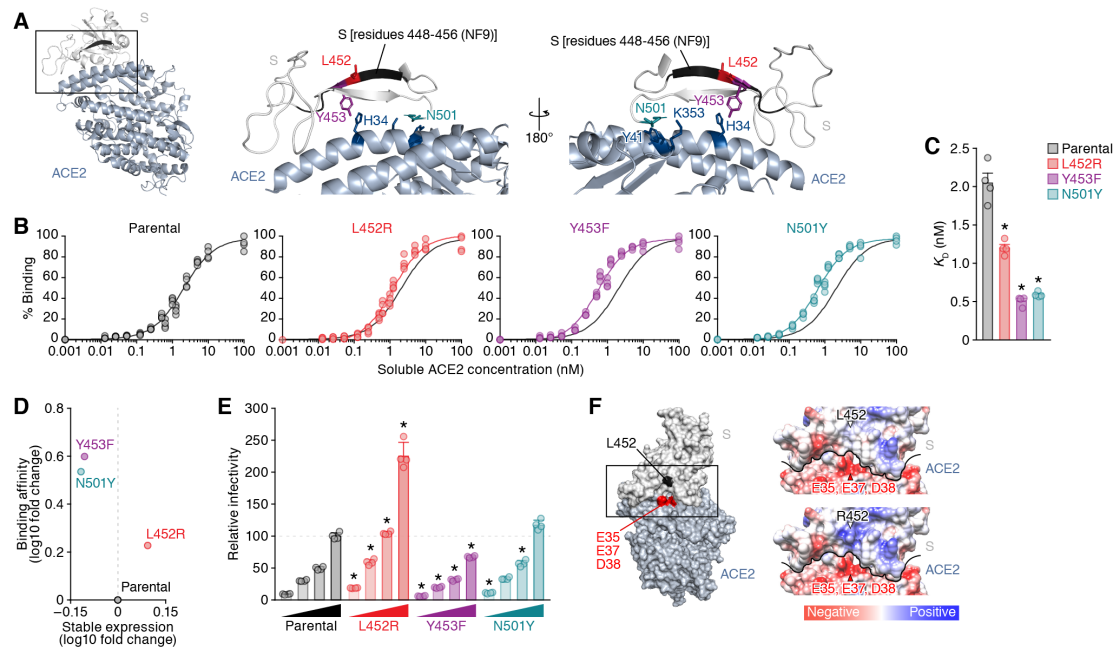

850

851 **Figure 2. Increase of the binding affinity to ACE2 and viral infectivity by the**  
 852 **L452 mutation.**

853 (A) Location of the NF9 peptide (residues 448-456) in the cocrystal structure of the  
 854 SARS-CoV-2 S and human ACE2 proteins (PDB: 6M17) (Yan et al., 2020). An  
 855 overview (left), the enlarged view of the boxed area in the left panel (middle) and the  
 856 view of the middle panel rotated 180° on the y-axis (right) are shown. The residues  
 857 448-456 of SARS-CoV-2 S (corresponding to the NF9 peptide) are shown in black.  
 858 (B-D) Binding affinity of SARS-CoV-2 S RBD to ACE2 by yeast surface display. The  
 859 percentage of the binding of the SARS-CoV-2 S RBD expressing on yeast to soluble  
 860 ACE2 (B) and the  $K_D$  values (C) are shown. (D) The level of stable expression of the  
 861 SARS-CoV-2 RBD on yeast (x-axis) and the binding affinity to ACE2 (y-axis)  
 862 compared to parental RBD. In B, the fitting curve of parental RBD is shown in all  
 863 panels as black lines.

864 (E) Pseudovirus assay. The HIV-based reporter virus pseudotyped with the parental  
 865 SARS-CoV-2 S or its derivatives (L452R, Y453F and N501Y) were inoculated into  
 866 the 293 cells transiently expressing human ACE2 and TMPRSS2 at 4 different doses  
 867 (1, 3, 5 and 10 ng p24 antigens). The percentages of the infectivity compared to the  
 868 virus pseudotyped with parental S (10 ng p24 antigen) are shown.

869 (F) Gain of electrostatics complementarity by the L452R substitution. (Left) The  
 870 surface structure of the SARS-CoV-2 S and ACE2 (PDB: 6M17) (Yan et al., 2020).  
 871 The residue 452 of the SARS-CoV-2 S and the negatively charged patch on ACE2  
 872 (residues E35, E37 and D38) are indicated by black and red. The boxed area is

873 enlarged in the upper right panel. (Right) Coulombic surface coloring at the  
874 structures of the SARS-CoV-2 S and ACE2 (PDB: 6M17) (Yan et al., 2020) (top) and  
875 a model of the L452R substitution (bottom). The black line indicates the border  
876 between SARS-CoV-2 S and ACE2.

877 In **B and E**, these assays were performed in quadruplicate.

878 In **C**, statistically significant differences (\*,  $P < 0.05$ ) versus parental S are determined  
879 by Mann-Whitney U test.

880 In **E**, statistically significant differences (\*,  $P < 0.05$ ) versus parental S at the same  
881 dose are determined by ANOVA with multiple comparisons by Bonferroni correction.  
882

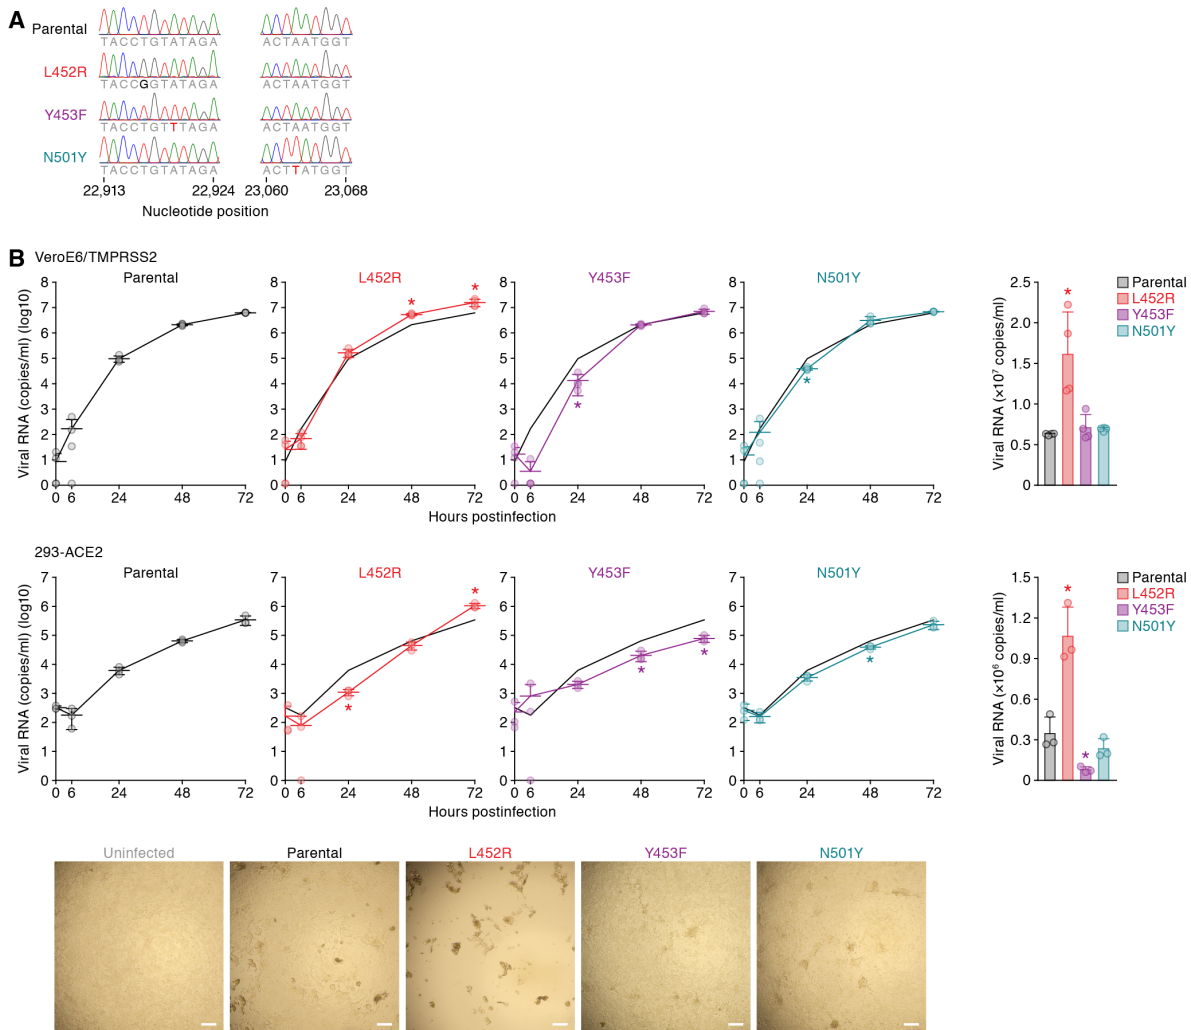

883

884 **Figure 3. Enhancement of viral replication by the L452R mutation.**

885 (A) Chromatograms of the mutated regions of the SARS-CoV-2 viruses artificially  
 886 generated by reverse genetics. The chromatograms of the nucleotide positions  
 887 22,913-22,924 (left) and 23,060-23,068 (right) of parental SARS-CoV-2, the L452R,  
 888 Y453F and N501Y mutants are shown.

889 (B) Growth kinetics of parental SARS-CoV-2 and the SARS-CoV-2 mutants.  
 890 Parental SARS-CoV-2, the L452R, Y453F and N501Y mutants (100 pfu) were  
 891 inoculated into VeroE6/TMPRSS2 cells (top) and 293-ACE2 cells (middle) and the  
 892 copy number of viral RNA in the culture supernatant was quantified by real-time RT-  
 893 PCR. (Left) The growth curve of the viruses inoculated. The result of parental virus  
 894 is shown in all panels as a black line. (Right) The amount of viral RNA in the culture  
 895 supernatant at 72 h postinfection. The assays were performed in quadruplicate  
 896 (VeroE6/TMPRSS2 cells) or triplicate (293-ACE2 cells), and statistically significant  
 897 differences (\*,  $P < 0.05$ ) versus parental S are determined by Student's *t* test. (Bottom)

898 Representative figures of the blight fields of 293-ACE2 cells infected with the viruses  
899 indicated at 72 h post infection are also shown. Bars, 200  $\mu\text{m}$ .  
900

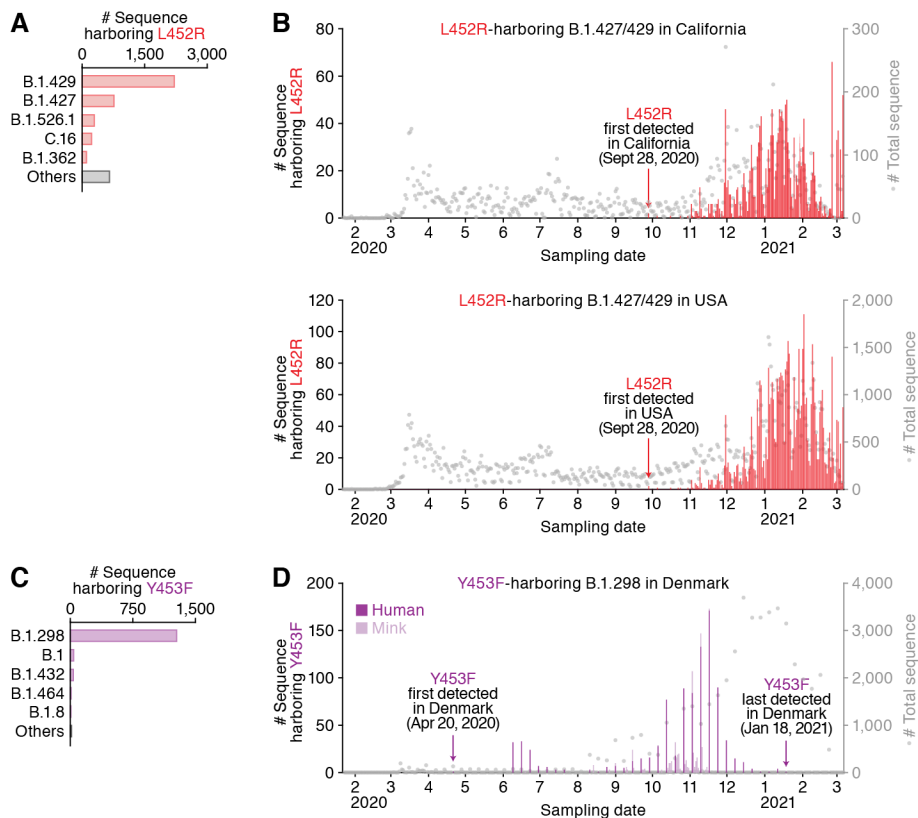

901

902 **Figure 4. Epidemic dynamics of the B.1.298 and B.1.427/429 lineages during**  
 903 **the current pandemic.**

904 The PANGO lineages harboring the L452R (**A and B**) and Y453F (**C and D**) and  
 905 their epidemic dynamics are summarized.

906 (**A and C**) Distribution of the L452R and Y453F mutants during the current pandemic.  
 907 The top 5 PANGO lineages (<https://cov-lineages.org/index.html>) that harbor the  
 908 L452R (**A**) and Y453F (**C**) mutations are shown. The raw data are summarized in  
 909 **Table S3.**

910 (**B and D**) Epidemic dynamics of the L452R-harboring B.1.427/429 lineage in  
 911 California state, the USA (**B, top**) and the USA (**B, bottom**) and the Y453F-harboring  
 912 B.1.298 lineage in Denmark (**D**). The numbers of the sequences harboring mutation  
 913 per day (left y-axis, bars) and the numbers of total sequences per day (right y-axis,  
 914 dots), from January 22, 2020 to March 6, 2021, are summarized. Note that a L452R  
 915 variant isolated from gorilla and three Y453F variants isolated from cats are not  
 916 included.

917 See also **Figure S2** and **Tables S3** and **S4**.



**Table 1. Naturally occurring mutations in the residues 448-456 of the SARS-CoV-2 S protein**

| Mutation | # Sequence | Date, first detected | Country, first detected | Dominant PANGO lineage | Date, first detected in the dominant lineage | Country, first detected in the dominant lineage | Nonhuman hosts detected <sup>a</sup> |
|----------|------------|----------------------|-------------------------|------------------------|----------------------------------------------|-------------------------------------------------|--------------------------------------|
| L452R    | 5,677      | March 17, 2020       | Denmark                 | B.1.427/429            | July 6, 2020                                 | Mexico                                          | Gorilla (1)                          |
| Y453F    | 1,380      | April 20, 2020       | Denmark                 | B.1.298                | April 20, 2020                               | Denmark                                         | Mink (339) and cat (3)               |
| N450K    | 181        | March 27, 2020       | UK                      | B.1.214.2              | December 5, 2020                             | UK                                              | -                                    |
| L452M    | 140        | April 13, 2020       | Japan                   | B.1.22/36              | July 2, 2020                                 | Netherlands                                     | Mink (32)                            |
| L452Q    | 111        | March 6, 2020        | Spain                   | B.1.1.374              | October 23, 2020                             | Belarus                                         | -                                    |

918 <sup>a</sup> The number in parenthesis indicates the number of sequence reported.

- 919 **Table S1.** Distribution of HLA-A24 allele in each population, related to Figure 1  
920
- 921 **Table S2.** Countries where the naturally occurring mutations in the residues 448-  
922 456 of the SARS-CoV-2 S protein were isolated, related to Figure 1  
923
- 924 **Table S3.** The PANGO lineages harboring the L452R and Y453F mutations, related  
925 to Figure 4  
926
- 927 **Table S4.** The PANGO lineages dominantly expanding in the USA, related to Figure  
928 4  
929
- 930 **Table S5.** HLA-A\*24:02-positive COVID-19 convalescent samples used in this study,  
931 related to Figure 1  
932
- 933 **Table S6.** The SARS-CoV-2 genomic region encoded in each template and the  
934 primers used for the preparation of each fragment for CPER, related to Figure 3

935 **STAR★METHODS**

936

937 **KEY RESOURCES TABLE**

938 **RESOURCE AVAILABILITY**

939 **Lead Contact**

940 Further information and requests for resources and reagents should be directed to  
941 and will be fulfilled by the Lead Contact, Kei Sato ([KeiSato@g.ecc.u-tokyo.ac.jp](mailto:KeiSato@g.ecc.u-tokyo.ac.jp)).

942

943 **Materials Availability**

944 All unique reagents generated in this study are listed in the Key Resources Table  
945 and available from the Lead Contact with a completed Materials Transfer Agreement.

946

947 **Data and Code Availability**

948 Additional Supplemental Items are available from Mendeley Data at <http://...>

949

950 **EXPERIMENTAL MODEL AND SUBJECT DETAILS**

951 **Ethics Statement**

952 All protocols involving the human subjects recruiting at Kyushu University Hospital,  
953 Japan, National Hospital Organization Kyushu Medical Center, Japan, and Tokyo  
954 Metropolitan Cancer and Infectious Diseases Center Komagome Hospital, Japan,  
955 were reviewed and approved by the Ethics Committee for Epidemiological and  
956 General Research at the Faculty of Life Science, Kumamoto University (approval  
957 numbers 2066 and 461). All human subjects provided written informed consent.

958

959 **Cell Culture**

960 Human PBMCs were obtained from a total of 15 subjects harboring HLA-A\*24:02  
961 including 12 COVID-19 convalescents and 3 seronegatives (**Table S5**). The PBMCs  
962 were purified by a density gradient centrifugation using Ficoll-Paque Plus (GE  
963 Healthcare Life Sciences, cat# 17-1440-03) and stored in liquid nitrogen until further  
964 use. The C1R cells expressing HLA-A\*2402 (C1R-A2402) ([Karaki et al., 1993](#)) were  
965 maintained in RPMI1640 medium (Thermo Fisher Scientific, cat# 11875101)  
966 containing 10% fetal calf serum (FCS) and 1% antibiotics (penicillin and  
967 streptomycin; PS).

968 HEK293 cells (a human embryonic kidney cell line; ATCC CRL-1573) and HEK293T  
969 cells (a human embryonic kidney cell line; ATCC CRL-3216) were maintained in

970 Dulbecco's modified Eagle's medium (high glucose) (Wako, cat# 044-29765)  
971 containing 10% FCS and 1% PS.  
972 Vero cells [an African green monkey (*Chlorocebus sabaeus*) kidney cell line;  
973 JCRB0111] were maintained in Eagle's minimum essential medium (Wako, cat#  
974 051-07615) containing 10% FCS and 1% PS.  
975 VeroE6/TMPRSS2 cells [an African green monkey (*Chlorocebus sabaeus*) kidney  
976 cell line; JCRB1819] ([Matsuyama et al., 2020](#)) were maintained in Dulbecco's  
977 modified Eagle's medium (low glucose) (Wako, cat# 041-29775) containing 10%  
978 FCS, G418 (1 mg/ml; Nacalai Tesque, cat# G8168-10ML) and 1% PS.  
979 HEK293-C34 cells, the *IFNAR1* KO HEK293 cells expressing human ACE2 and  
980 TMPRSS2 by doxycycline treatment ([Torii et al., 2021](#)), were maintained in  
981 Dulbecco's modified Eagle's medium (high glucose) (Sigma-Aldrich, cat# R8758-  
982 500ML) containing 10% FCS, Blasticidin (10 µg/ml; Invivogen, cat# ant-bl-1) and 1%  
983 PS.  
984 Expi293F cells (Thermo Fisher Scientific, cat# A14527) were maintained in Expi293  
985 expression medium (Thermo Fisher Scientific, cat# A1435101).

986

## 987 **METHOD DETAILS**

### 988 **Viral Genomes and Phylogenetic Analyses**

989 All viral genome sequences and annotation information used in this study were  
990 downloaded from GISAID (<https://www.gisaid.org>) as of March 15, 2021 (750,243  
991 sequences). We used the viral nucleotide sequences that do not contain any  
992 undetermined nucleotides in the region coding S protein for the analysis (581,367  
993 sequences). The SARS-CoV-2 variants containing the L452R or Y453F mutation  
994 were sorted from the verified 581,367 sequences (**Tables S2 and S3**). To infer the  
995 phylogeny of B.1.1.298 lineage (**Figure S2**), we collected the 657 sequences  
996 belonging to the B.1.1.298 lineage that do not contain any undetermined nucleotides.  
997 We aligned whole genome sequences by using FFT-NS-2 program in an MAFFT  
998 suite v7.467 ([Kato and Standley, 2013](#)) and removed gapped regions using trimAl  
999 v1.4.rev22 with a gappyout option ([Capella-Gutierrez et al., 2009](#)). We selected  
1000 GTR+I as the best-fit nucleotide substitution model using ModelTest-NG v0.1.5  
1001 ([Darriba et al., 2020](#)). Using the model, we generated a maximum-likelihood based  
1002 phylogenetic tree using RAXML-NG v1.0.0 ([Kozlov et al., 2019](#)) with a bootstrap test  
1003 (n=100).

1004

### 1005 **Activation Induced Marker Assay**

1006 The expansion of antigen-specific human CD8<sup>+</sup> T cells and the analysis of the  
1007 surface expression levels of activation markers, CD25 and CD137, were performed

1008 as previously described (Wolff et al., 2007). Briefly, human PBMCs were pulsed with  
1009 1 µg/ml of the SARS-CoV-2 PepTivator peptide pools (“S overlap peptides”) (Miltenyi  
1010 Biotec, cat# 130-126-700) and maintained in RPMI 1640 medium (Thermo Fisher  
1011 Scientific, cat# 11875101) containing 10% FCS and 30 U/ml recombinant human IL-  
1012 2 (Peprotec, cat# 200-02) for 10-14 days. The *in vitro* expanded CD8<sup>+</sup> T cells (i.e.,  
1013 the CTL lines) were stimulated with or without the NF9 peptide (NYNYLYRLF,  
1014 residues 448-456 of the SARS-CoV-2 S protein; synthesized by Scrum Inc.). After  
1015 the incubation at 37°C for 1 h, the cells were washed and the surface proteins (CD3,  
1016 CD8, CD14, CD19, CD25 and CD137) were stained with the antibodies listed in **Key**  
1017 **Resources Table**. The dead cells were stained with 7-aminoactinomycin D  
1018 (Biolegend, cat# 420404). After the incubation for 20 min on ice, the cells were fixed  
1019 with 1% paraformaldehyde (Nacalai Tesque, cat# 09154-85) and the levels of protein  
1020 surface expression were analyzed by flow cytometry using a FACS Canto II (BD  
1021 Biosciences). The data obtained by flow cytometry were analyzed by FlowJo  
1022 software (Tree Star).

1023

#### 1024 **Analysis of Multifunctionality and Cytotoxic Potential of CD8<sup>+</sup> T cells**

1025 C1R-A2402 cells were pulsed with or without the NF9 peptide or its derivatives [the  
1026 NF9-L452R peptide (NYNYRYRLF, L5R in NF9) and the NF9-Y453F peptide  
1027 (NYNYL<sup>u</sup>ERLF, Y6F in NF9); synthesized by Scrum Inc.] at concentrations from 0.1  
1028 to 10 nM at 37°C for 1 h. The cells were washed twice with PBS, mixed with the CTL  
1029 lines generated from COVID-19 convalescents (see above) and incubated with  
1030 RPMI 1640 medium (Thermo Fisher Scientific, cat# 11875101) containing 10% FCS,  
1031 5 µg/ml brefeldin A (Sigma-Aldrich, cat# B7651), 2 µM monensin (Biolegend, cat#  
1032 420701) and BV421-anti-CD107a antibody (Biolegend, cat# 420404) in a 96-well U  
1033 plate at 37°C for 5 h. Then, the cells were washed and the surface proteins (CD3,  
1034 CD8, CD14 and CD19) were stained with the antibodies listed in **Key Resources**  
1035 **Table**. The dead cells were stained with 7-aminoactinomycin D (Biolegend, cat#  
1036 420404). After the incubation at 37°C for 30 min, the cells were fixed and  
1037 permeabilized with Cytofix/Cytoperm Fixation/Permeabilization solution kit (BD  
1038 Biosciences, cat# 554714) and the intracellular proteins (IFN-γ, TNF-α and IL-2)  
1039 were stained with the antibodies listed in **Key Resources Table**. After the incubation  
1040 at room temperature for 30 min, the cells were washed and the levels of protein  
1041 expression were analyzed by flow cytometry using a FACS Canto II (BD  
1042 Biosciences). The data obtained by flow cytometry were analyzed by FlowJo  
1043 software (Tree Star).

1044

#### 1045 **Plasmid Construction**

1046 The plasmids expressing the SARS-CoV-2 S protein (pCAGGS-SARS2-S) and its  
1047 mutants (pCAGGS-S-L452R, pCAGGS-SARS2-S-Y453F and pCAGGS-SARS2-S-  
1048 N501Y) were generated by site-directed mutagenesis PCR using pC-SARS2-S  
1049 (kindly provided by Kenzo Tokunaga) ([Ozono et al., 2021](#)) as the template and the  
1050 following primers: S forward, 5'-TTG GGTACC ATG TTT GTG TTC CTG GTG CTG-  
1051 3'; S reverse, 5'-GTG GCGGCCGC TCT AGA TTC AGG TGT AGT GCA GTT T-3';  
1052 S Y453F forward, 5'-GTG GGA GGC AAC TAC AAC TAC CTC TTC AGA-3'; and S  
1053 L452R/Y453F reverse, 5'-GTT GTA GTT GCC TCC CAC CTT-3'; S N501Y forward,  
1054 5'-TCC TAT GGC TTC CAA CCA ACC TAT GGA-3'; and S N501Y reverse, 5'-TGG  
1055 TTG GAA GCC ATA GGA TTG-3'. The resultant PCR fragment was digested with  
1056 KpnI and NotI and inserted into the KpnI-NotI site of pCAGGS vector ([Niwa et al.,  
1057 1991](#)).

1058 To construct the expression plasmid for human ACE2 (GenBank:  
1059 NM\_021804.3) (pLV-EF1a-human ACE2-IRES-Puro), the MluI-SmaI fragment  
1060 pTarget-human ACE2 (kindly provided by Shuetsu Fukushi) ([Fukushi et al., 2007](#))  
1061 was inserted into the MluI-HpaI site of pLV-EF1a-IRES-Puro (Addgene #85132).  
1062 Nucleotide sequences were determined by a DNA sequencing service (Fasmac),  
1063 and the sequence data were analyzed by Sequencher v5.1 software (Gene Codes  
1064 Corporation).

1065

### 1066 **Preparation of Soluble Human ACE2**

1067 To prepare soluble human ACE2, the expression plasmid for the extracellular  
1068 domain of human ACE2 (residues 18-740) based on pHL-sec (Addgene, cat# 99845)  
1069 ([Zahradník et al., 2021a](#)) was transfected into Expi293F cells using ExpiFectamine  
1070 293 transfection kit (Thermo Fisher Scientific, cat# A14525) according to the  
1071 manufacturer's protocol. Three days posttransfection, the culture medium was  
1072 harvested, centrifuged, and filtrated through a 0.45- $\mu$ m pore size filter (Thermo  
1073 Fisher Scientific, cat# 09-740-114). The filtered medium was applied on a 5-ml of  
1074 HisTrap Fast Flow column (Cytiva, cat# 17-5255-01) equilibrated by phosphate  
1075 buffered saline (PBS) using ÄKTA pure chromatography system (Cytiva). The  
1076 column was washed with PBS and the pure human ACE2 protein (residues 18-740)  
1077 was eluted using the PBS supplemented with 300 mM imidazole (pH 7.4). Using  
1078 Ultracel-3 regenerated cellulose membrane (Merck, cat# UFC900324), the buffer  
1079 was exchanged to PBS and the purified protein was concentrated. The purity of  
1080 prepared protein was analyzed by a Tycho NT.6 system (NanoTemper).

1081

### 1082 **Preparation of the Yeast-Based SARS-CoV-2 RBD Expression System**

1083 A labeling-free yeast surface display plasmid pJYDC1 (Addgene, cat# 162458)  
1084 ([Zahradník et al., 2021b](#)) encoding the SARS-CoV-2 S RBD (residues 336-528)  
1085 (pJYDC1-RBD) ([Zahradník et al., 2021a](#)) was modified by the restriction enzyme-  
1086 free cloning procedure ([Peleg and Unger, 2014](#)). To prepare the plasmids with the  
1087 mutated RBD, megaprimers were amplified by PCR using KAPA HiFi HotStart  
1088 ReadyMix kit (Roche, cat# KK2601) and the following primers: RBD L452R forward:  
1089 5'-GGA CAG CAA GGT GGG AGG CAA CTA CAA CTA CAG ATA CAG ACT GTT  
1090 CAG GAA GAG CAA C-3'; RBD Y453F reverse: 5'-CTC AAA TGG TTT CAG GTT  
1091 GCT CTT CCT GAA CAG TCT GAA GAG GTA GTT GTA GTT GCC TCC C-3';  
1092 RBD N501Y reverse: 5'-GTA TGG TTG GTA GCC CAC TCC ATA GGT TGG TTG  
1093 GAA GCC ATA GGA TTG-3'; pCT\_seq Reverse: 5'-CAT GGG AAA ACA TGT TGT  
1094 TTA CGG AG-3'; and pCTCON\_seq Forward: 5'-GCA GCC CCA TAA ACA CAC  
1095 AGT AT-3', according to the manufacturer's protocol. The PCR products were  
1096 integrated into pJYDC1 by integration PCR as previously described ([Peleg and  
1097 Unger, 2014](#)).

1098

#### 1099 **Analysis of the Binding Affinity of the SARS-CoV-2 S RBD Variants to Human** 1100 **ACE2 by Yeast Surface Display**

1101 The pJYDC1-based yeast display plasmids expressing SARS-CoV-2 RBD and its  
1102 mutants were transformed into yeast (*Saccharomyces cerevisiae*; strain EBY100,  
1103 ATCC MYA-4941) and selected by the growth on the SD-W plates ([Peleg and Unger,  
1104 2014](#)). Single colonies were grown in 1-ml liquid SD-CAA medium ([Zahradník et al.,  
1105 2021a](#)) overnight at 30°C (220 rpm) and used to inoculate the expression cultures in  
1106 the 1/9 medium ([Zahradník et al., 2021a](#)) with 1 nM bilirubin (Sigma-Aldrich, cat#  
1107 14370-1G). The cells were washed with PBS-B buffer [PBS supplemented with  
1108 bovine serum albumin (1 g/l)] and aliquoted in analysis solutions. The analysis  
1109 solutions consist of the PBS-B buffer with the 14 different concentrations (covering  
1110 the range from 100 nM to 1 pM) of the human ACE2 protein (residues 18-740) that  
1111 is labeled with CF640R succinimidyl ester (Biotium, cat# 92108). The volume of the  
1112 analysis solution was adjusted (1-100 ml) in order to reduce the effect of ligand  
1113 depletion ([Zahradník et al., 2021b](#)). The yeasts expressing the SARS-CoV-2 S RBDs  
1114 were incubated with the analysis solution overnight to allow for equilibrium.  
1115 Subsequently, the yeasts were washed with the PBS-B buffer, passed through a 40-  
1116 µm cell strainer (SPL Life Sciences, cat# 93040), and the binding affinity to the  
1117 CF640R-labeled human ACE2 protein (residues 18-740) was analyzed using an  
1118 Accuri C6 flow cytometer (BD Biosciences). The fluorescent signal was processed  
1119 as previously described ([Zahradník et al., 2021b](#)) and the standard non-cooperative

1120 Hill equation was fitted by nonlinear least-squares regression using Python v3.7  
1121 (<https://www.python.org>).

1122

### 1123 **Pseudovirus Assay**

1124 To prepare the pseudoviruses, the lentivirus (HIV)-based, luciferase-expressing  
1125 reporter viruses that are pseudotyped with the SARS-CoV-2 S protein and its  
1126 derivatives, HEK293T cells ( $1 \times 10^6$  cells) were cotransfected with 1  $\mu$ g of psPAX2-  
1127 IN/HiBiT ([Ozono et al., 2020](#)), and 1  $\mu$ g of pWPI-Luc2 ([Ozono et al., 2020](#)), and 500  
1128 ng of the plasmids expressing parental S or its derivatives (L452R, Y453F or N501Y)  
1129 using Lipofectamine 3000 (Thermo Fisher Scientific, cat# L3000015) according to  
1130 the manufacturer's protocol. Two days posttransfection, the culture supernatants  
1131 were harvested, centrifuged, and treated with 37.5 U/ml DNase I (Roche, cat#  
1132 Sigma-Aldrich, cat# 11284932001) at 37°C for 30 min. The amount of the  
1133 pseudoviruses prepared was quantified by HiBiT assay and the measured value was  
1134 normalized to the level of HIV p24 antigen as previously described ([Ozono et al.,](#)  
1135 [2021](#); [Ozono et al., 2020](#)). The pseudoviruses prepared were stored at  $-80^\circ\text{C}$  until  
1136 use.

1137 To prepare the target cells for pseudovirus infection, HEK293T cells ( $1 \times$   
1138  $10^6$  cells) were cotransfected with 250 ng of pC-TMPRSS2 ([Ozono et al., 2021](#)) and  
1139 500 ng of pC-ACE2 (a human ACE2 expression plasmid) ([Ozono et al., 2021](#)) using  
1140 Lipofectamine 2000 (Thermo Fisher Scientific, cat# 11668019) according to the  
1141 manufacturer's protocol. Two days posttransfection, the transfected cells (22,000  
1142 cells/100  $\mu$ l) were seeded into 96-well plates and infected with 100  $\mu$ l of the  
1143 pseudoviruses prepared at 4 different doses (1, 3, 5 and 10 ng of p24 antigen). Two  
1144 days postinfection, the infected cells were lysed with One-Glo luciferase assay  
1145 system (Promega, cat# E6130), and the luminescent signal was measured by using  
1146 a CentroXS3 plate reader (Berthold Technologies).

1147

### 1148 **Lentiviral Transduction**

1149 Lentiviral transduction was performed as described previously ([Anderson et al.,](#)  
1150 [2018](#); [Ikeda et al., 2019](#)). Briefly, the VSV-G-pseudotyped lenvirus vector expressing  
1151 human ACE2 was generated by transfecting 2.5  $\mu$ g of pLV-EF1a-human ACE2-  
1152 IRES-Puro plasmid with 1.67  $\mu$ g of p $\Delta$ -NRF (expressing HIV-1 *gag*, *pol*, *rev*, and *tat*  
1153 genes) ([Naldini et al., 1996](#)) and 0.83  $\mu$ g of pVSV-G (expressing VSV-G; Addgene,  
1154 cat#138479) into 293T cells ( $3 \times 10^6$  cells) using TransIT-LT1 (Takara, cat#  
1155 MIR2300) according to the manufacturer's protocol. Two days posttransfection, the  
1156 culture supernatants were harvested, centrifuged, and the supernatants were filtered  
1157 with 0.45  $\mu$ m pore size filter (Millipore, cat# SLGVR33RB) and collected as the



1158 lentiviral vector. The lentivirus vectors were concentrated by centrifugation (at 22,000  
1159 × g for 2 h at 4°C) and the concentrated lentiviral vectors were inoculated into the  
1160 target cells and incubated at 37°C. Two days posttransduction, the transduced cells  
1161 were placed under the drug selection using the culture medium containing 1 µg/ml  
1162 puromycin (Invivogen, cat# ant-pr-1). The puromycin-selected cells with relatively  
1163 higher ACE2 expression were sorted by a FACS Aria II (BD Biosciences) and  
1164 expanded. After the expansion, the expression level of surface ACE2 was verified  
1165 by a FACS Canto II (BD Biosciences). For the staining of surface ACE2, a goat anti-  
1166 ACE2 polyclonal antibody (R&D systems, cat# AF933) and an APC-conjugated  
1167 donkey anti-goat IgG (R&D systems, cat# F0108) were used. A normal goat IgG  
1168 (R&D systems, cat# AB-108-C) was used as the negative control of this assay.

1169

### 1170 **Protein Structure**

1171 The 3D visualization of the SARS-CoV-2 S and human ACE2 proteins (**Figures 2A**  
1172 **and 2F**) was generated using PyMOL v2.3 (<https://pymol.org/2/>) with the cocrystal  
1173 structure of the SARS-CoV-2 S and human ACE2 proteins (PDB: 6M17) ([Yan et al.,](#)  
1174 [2020](#)). The L452R substitution (**Figure 2F**) was prepared using UCSF Chimera  
1175 v1.13 ([Pettersen et al., 2004](#)).

1176

### 1177 **SARS-CoV-2 Reverse Genetics**

1178 Recombinant SARS-CoV-2 was generated by circular polymerase extension  
1179 reaction (CPER) as previously described ([Torii et al., 2021](#)). In brief, the 9 DNA  
1180 fragments encoding the partial genome of SARS-CoV-2 (strain WK-521; GISAID ID:  
1181 EPI\_ISL\_408667) ([Matsuyama et al., 2020](#)) were prepared by PCR using  
1182 PrimeSTAR GXL DNA polymerase (Takara, cat# R050A). Additionally, a linker  
1183 fragment encoding hepatitis delta virus ribozyme (HDVr), bovine growth hormone  
1184 (BGH) polyA signal and cytomegalovirus (CMV) promoter was prepared by PCR.  
1185 The corresponding SARS-CoV-2 genomic region and the templates and the primers  
1186 of this PCR are summarized in **Table S6**. The obtained 10 DNA fragments were  
1187 mixed and used for the CPER ([Torii et al., 2021](#)).

1188 To produce the recombinant SARS-CoV-2, the CPER products were  
1189 transfected into HEK293-C34 cells using TransIT-LT1 (Takara, cat# MIR2300)  
1190 according to the manufacturer's protocol. One day posttransfection, the culture  
1191 medium was replaced with Dulbecco's modified Eagle's medium (high glucose)  
1192 (Sigma-Aldrich, cat# R8758-500ML) containing 2% FCS, 1% PS and doxycycline (1  
1193 µg/ml; Takara, cat# 1311N). Six days posttransfection, the culture medium was  
1194 harvested, centrifuged, and the supernatants were collected as the seed virus. To  
1195 remove the CPER products (i.e., SARS-CoV-2-related DNA), 1 ml of the seed virus

1196 was treated with 2 µl TURBO DNase (Thermo Fisher Scientific, cat# AM2238) and  
1197 incubated at 37 °C for 1 h. The complete removal of the CPER products (i.e., SARS-  
1198 CoV-2-related DNA) from the seed virus was verified by PCR. To prepare the  
1199 working virus of the recombinant SARS-CoV-2 for the virological experiments  
1200 (**Figure 3**), 100 µl of the seed virus was inoculated into VeroE6/TMPRSS2 cells  
1201 (5,000,000 cells in T-75 flask). One hour after infection, the culture medium was  
1202 replaced with Dulbecco's modified Eagle's medium (low glucose) (Wako, cat# 041-  
1203 29775) containing 2% FCS and 1% PS. Two days postinfection, the culture medium  
1204 was harvested, centrifuged, and the supernatants were collected as the working  
1205 virus.

1206 To generate the recombinant SARS-CoV-2 mutants, mutations were  
1207 inserted into the fragment 8 (**Table S6**) using GENEART Site-Directed mutagenesis  
1208 system (Thermo Fisher Scientific, cat# A13312) and the following primers: Fragment  
1209 8\_S L452R forward, 5'-CTA AGG TTG GTG GTA ATT ATA ATT ACC GGT ATA  
1210 GAT TGT TTA GGA AGT CTA ATC-3'; Fragment 8\_S L452R reverse, 5'-GAT TAG  
1211 ACT TCC TAA ACA ATC TAT ACC GGT AAT TAT AAT TAC CAC CAA CCT TAG-  
1212 3'; Fragment 8\_S Y453F forward, 5'-GGT TGG TGG TAA TTA TAA TTA CCT GTT  
1213 TAG ATT GTT TAG GAA GTC TAA TCT C-3'; Fragment 8\_S Y453F reverse, 5'-  
1214 GAG ATT AGA CTT CCT AAA CAA TCT AAA CAG GTA ATT ATA ATT ACC ACC  
1215 AAC C-3'; Fragment 8\_S N501Y forward, 5'-CAA TCA TAT GGT TTC CAA CCC  
1216 ACT TAT GGT GTT GGT TAC CAA CCA TAC AG-3'; and Fragment 8\_S N501Y  
1217 reverse, 5'-CTG TAT GGT TGG TAA CCA ACA CCA TAA GTG GGT TGG AAA  
1218 CCA TAT GAT TG-3', according to the manufacturer's protocol. Nucleotide  
1219 sequences were determined by a DNA sequencing service (Fasmac), and the  
1220 sequence data were analyzed by Sequencher version 5.1 software (Gene Codes  
1221 Corporation). The CPER for the preparation of SARS-CoV-2 mutants was performed  
1222 using the mutated fragment 8 instead of the parental fragment 8. Subsequent  
1223 experimental procedures correspond to the procedure for parental SARS-CoV-2  
1224 preparation (described above). To verify the inserted mutation in the working viruses,  
1225 viral RNA was extracted using QIAamp viral RNA mini kit (Qiagen, cat# 52906). Viral  
1226 RNA was reversed transcribed using SuperScript III reverse transcriptase (Thermo  
1227 Fisher Scientific, cat# 18080085) according to manufacturers' protocols. The DNA  
1228 fragments including the mutations inserted were obtained by RT-PCR using  
1229 PrimeSTAR GXL DNA polymerase (Takara, cat# R050A) and the following primers:  
1230 WK-521 22607-22630 forward: 5'-GCA TCT GTT TAT GCT TGG AAC AGG-3'; and  
1231 WK-521 23342-23367 reverse: 5'-CCT GGT GTT ATA ACA CTG ACA CCA CC-3'.  
1232 Nucleotide sequences were determined as described above, and the sequence

1233 chromatograms (**Figure 3A**) were visualized using a web application Tracy  
1234 (<https://www.gear-genomics.com/teal/>) (Rausch et al., 2020).

1235

### 1236 **Plaque Assay**

1237 One day prior to infection, 200,000 Vero cells were seeded into the 12-well plate.  
1238 The virus was diluted with serum-free virus dilution buffer [1 × minimum essential  
1239 medium (Temin's modification) (Thermo Fisher Scientific, cat# 11935046) with 20  
1240 mM Hepes, non-essential amino acid (Thermo Fisher Scientific, cat# 11140-050) and  
1241 antibiotics]. After removing the culture media, Vero cells were infected with 500 µl of  
1242 the diluted virus at 37 °C. Two hours postinfection, 1 ml of mounting solution [1 ×  
1243 minimum essential medium containing 3% FCS and 1.5% carboxymethyl cellulose  
1244 (Sigma, cat# C9481-500G)] was overlaid and incubated at 37 °C. Three days  
1245 postinfection, the culture media were removed, and the cells were washed with PBS  
1246 three times and fixed with 10% formaldehyde (Nacalai Tesque, cat# 37152-51) or  
1247 4% paraformaldehyde (Nacalai Tesque, cat# 09154-85). The fixed cells were  
1248 washed with city water, dried up, and stained with staining solution [2% crystal violet  
1249 (Nacalai Tesque, cat# 09804-52) or 0.1% methylene blue (Nacalai Tesque, cat#  
1250 22412-14) in water]. The stained cells were washed with city water, dried up, and  
1251 the number of plaques was counted to calculate plaque forming unit (pfu).

1252

### 1253 **SARS-CoV-2 Infection**

1254 One day prior to infection, 10,000 cells of VeroE6/TMPRSS2 and 293-ACE2 cells  
1255 were seeded into the 96-well plate. Recombinant SARS-CoV-2 (100 pfu) was  
1256 inoculated and incubated at 37 °C for 1 h. The infected cells were washed and  
1257 replaced with 180 µl of culture media. The culture supernatant (10 µl) was harvested  
1258 at 0, 6, 24, 48 and 72 hours postinfection and used for real-time PCR to quantify the  
1259 copy number of viral RNA.

1260

### 1261 **Real-time RT-PCR**

1262 The amount of viral RNA in the culture supernatant was quantified by real-time RT-  
1263 PCR as previously described (Shema Mugisha et al., 2020) with some modifications.  
1264 In brief, 5 µl of culture supernatants was mixed with 5 µl of 2 × RNA lysis buffer [2%  
1265 Triton X-100, 50 mM KCl, 100 mM Tris-HCl (pH 7.4), 40% glycerol, 0.8 U/µl  
1266 recombinant RNase inhibitor (Takara, cat# 2313B)] and incubated at room  
1267 temperature for 10 min. RNase-free water (90 µl) was added and the diluted sample  
1268 (2.5 µl) was used as the template of real-time RT-PCR. Real-time RT-PCR was  
1269 performed according to the manufacturer's protocol using the One Step TB Green  
1270 PrimeScript PLUS RT-PCR kit (Takara, cat# RR096A) and the following primers:

1271 Forward *N*, 5'-AGC CTC TTC TCG TTC CTC ATC AC-3'; and Reverse *N*, 5'-CCG  
1272 CCA TTG CCA GCC ATT C-3'. The copy number of viral RNA was standardized by  
1273 SARS-CoV-2 direct detection RT-qPCR kit (Takara, cat# RC300A). The fluorescent  
1274 signal was acquired on a QuantStudio 3 Real-Time PCR systems (Thermo Fisher  
1275 Scientific), a CFX Connect Real-Time PCR Detection system (Bio-Rad) or a 7500  
1276 Real Time PCR System (Applied Biosystems) was used.

1277

#### 1278 **QUANTIFICATION AND STATISTICAL ANALYSIS**

1279 Data analyses were performed using Prism 7 (GraphPad Software). Unless  
1280 otherwise stated, the data are presented as means with SD. Statistically significant  
1281 differences were determined as described in the figure legend. Statistical details can  
1282 be found directly in the corresponding figure legends.

1283 **KEY RESOURCES TABLE**

| REAGENT or RESOURCE                                 | SOURCE                                     | IDENTIFIER                        |
|-----------------------------------------------------|--------------------------------------------|-----------------------------------|
| <b>Antibodies</b>                                   |                                            |                                   |
| FITC-conjugated anti-human CD3 antibody             | Biolegend                                  | Cat# 300440; RRID: AB_2562046     |
| BV510-conjugated anti-human CD3 antibody            | Biolegend                                  | Cat# 317331; RRID: AB_2561376     |
| APC-Cy7-conjugated anti-human CD8 antibody          | Biolegend                                  | Cat# 301016; RRID: AB_314134      |
| PerCP-Cy5.5-conjugated anti-human CD14 antibody     | Biolegend                                  | Cat# 325622; RRID: AB_893250      |
| PerCP-Cy5.5-conjugated anti-human CD19 antibody     | Biolegend                                  | Cat# 302230; RRID: AB_2073119     |
| PE-Cy7-conjugated anti-human CD25 antibody          | Biolegend                                  | Cat# 356107; RRID: AB_2561974     |
| APC-conjugated anti-human CD137 antibody            | Biolegend                                  | Cat# 309809; RRID: AB_830671      |
| BV421-conjugated anti-human CD107a antibody         | Biolegend                                  | Cat# 328625; RRID: AB_10899581    |
| PE-conjugated anti-human IFN- $\gamma$ antibody     | BD Biosciences                             | Cat# 554552; RRID: AB_395474      |
| PE-Cy7-conjugated anti-human TNF- $\alpha$ antibody | Biolegend                                  | Cat# 502930; RRID: AB_2204079     |
| APC-conjugated anti-human IL-2 antibody             | Biolegend                                  | Cat# 500310; RRID: AB_315097      |
| Anti-ACE2 antibody                                  | R&D systems                                | Cat# AF933; RRID: RRID: AB_355722 |
| APC-conjugated anti-goat IgG                        | R&D systems                                | Cat# F0108; RRID: AB_573124       |
| Goat normal IgG                                     | R&D systems                                | Cat# AB-108-C; RRID: AB_354267    |
| <b>Bacterial and Virus Strains</b>                  |                                            |                                   |
| SARS-CoV-2 (strain WK-521)                          | ( <a href="#">Matsuyama et al., 2020</a> ) | GISAID ID: EPI_ISL_408667         |
| <b>Biological Samples</b>                           |                                            |                                   |
| Human PBMCs                                         | This study                                 | N/A                               |

| Chemicals, Peptides, and Recombinant Proteins                        |                             |                   |
|----------------------------------------------------------------------|-----------------------------|-------------------|
| Ficoll-Paque Plus                                                    | GE Healthcare Life Sciences | Cat# 17-1440-03   |
| RPMI1640 medium                                                      | Thermo Fisher Scientific    | Cat# 11875101     |
| Fetal calf serum (FCS)                                               | Sigma-Aldrich               | Cat# 172012-500ML |
| Penicillin streptomycin (PS)                                         | Sigma-Aldrich               | Cat# P4333-100ML  |
| Dulbecco's modified Eagle's medium (high glucose)                    | Wako                        | Cat# 044-29765    |
| Eagle's minimum essential medium (with L-glutamine and phenol red)   | Wako                        | Cat# 051-07615    |
| Dulbecco's modified Eagle's medium (low glucose)                     | Wako                        | Cat# 041-29775    |
| G418                                                                 | Nacalai Tesque              | Cat# G8168-10ML   |
| Dulbecco's modified Eagle's medium (high glucose)                    | Sigma-Aldrich               | Cat# R8758-500ML  |
| Blasticidin                                                          | Invivogen                   | Cat# ant-bl-1     |
| Expi293 expression medium                                            | Thermo Fisher Scientific    | Cat# A1435101     |
| SARS-CoV-2 PepTivator peptide pools                                  | Miltenyi Biotec             | Cat# 130-126-700  |
| Recombinant human IL-2                                               | Peptotec                    | Cat# 200-02       |
| NF9 peptide (NYYLYRLF, residues 448-456 of the SARS-CoV-2 S protein) | This study                  | N/A               |
| L452R peptide (NYYRYRLF, L5R in NF9)                                 | This study                  | N/A               |
| Y453F peptide (NYYLFRRLF, Y6F in NF9)                                | This study                  | N/A               |
| 7-aminoactinomycin D                                                 | Biolegend                   | Cat# 420404       |
| Paraformaldehyde                                                     | Nacalai Tesque              | Cat# 09154-85     |
| Brefeldin A                                                          | Sigma-Aldrich               | Cat# B7651        |
| Monensin                                                             | Biolegend                   | Cat# 420701       |
| PrimeSTAR GXL DNA polymerase                                         | Takara                      | Cat# R050A        |
| KpnI                                                                 | New England Biolab          | Cat# R0142S       |
| NotI                                                                 | New England Biolab          | Cat# R1089S       |
| MluI-HF                                                              | New England Biolab          | Cat# R3198L       |
| SmaI                                                                 | New England Biolab          | Cat# R0141L       |
| HpaI                                                                 | New England Biolab          | Cat# R0105L       |
| BamHI-HF                                                             | New England Biolab          | Cat# R3136L       |
| Bilirubin                                                            | Sigma-Aldrich               | Cat# 14370-1G     |
| CF640R succinimidyl ester                                            | Biotium                     | Cat# 92108        |

|                                                         |                          |                  |
|---------------------------------------------------------|--------------------------|------------------|
| Lipofectamine 3000                                      | Thermo Fisher Scientific | Cat# L3000015    |
| Lipofectamine 2000                                      | Thermo Fisher Scientific | Cat# 11668019    |
| DNase I                                                 | Sigma-Aldrich            | Cat# 11284932001 |
| TransIT-LT1                                             | Takara                   | Cat# MIR2300     |
| Puromycin                                               | Invivogen                | Cat# ant-pr-1    |
| Doxycycline                                             | Takara                   | Cat# 1311N       |
| TURBO DNase                                             | Thermo Fisher Scientific | Cat# AM2238      |
| Minimum essential medium (2×), no phenol red            | Thermo Fisher Scientific | Cat# 11935046    |
| Non-essential amino acid                                | Thermo Fisher Scientific | Cat# 11140-050   |
| Carboxymethyl cellulose                                 | Sigma-Aldrich            | Cat# C9481-500G  |
| Formaldehyde                                            | Nacalai Tesque           | Cat# 37152-51    |
|                                                         |                          |                  |
| Crystal violet                                          | Nacalai Tesque           | Cat# 09804-52    |
| Methylene blue                                          | Nacalai Tesque           | Cat# 22412-14    |
| Recombinant RNase inhibitor                             | Takara                   | Cat# 2313B       |
| Critical Commercial Assays                              |                          |                  |
| Cytofix/Cytoperm Fixation/Permeabilization solution kit | BD Biosciences           | Cat# 554714      |
| QIAamp RNA blood mini kit                               | Qiagen                   | Cat# 52304       |
| SuperScript III reverse transcriptase                   | Thermo Fisher Scientific | Cat# 18080085    |
| ExpiFectamine 293 transfection kit                      | Thermo Fisher Scientific | Cat# A14525      |
| KAPA HiFi HotStart ReadyMix kit                         | Roche                    | Cat# KK2601      |
| One-Glo luciferase assay system                         | Promega                  | Cat# E6130       |
| GENEART Site-Directed mutagenesis system                | Thermo Fisher Scientific | Cat# A13312      |
| QIAamp viral RNA mini kit                               | Qiagen                   | Cat# 52906       |
| One Step TB Green PrimeScript PLUS RT-PCR kit           | Takara                   | Cat# RR096A      |
| SARS-CoV-2 direct detection RT-qPCR kit                 | Takara                   | Cat# RC300A      |
| Deposited Data                                          |                          |                  |
|                                                         |                          |                  |

| Experimental Models: Cell Lines                                                                                                  |                                         |             |
|----------------------------------------------------------------------------------------------------------------------------------|-----------------------------------------|-------------|
| Human: C1R-A2402 cells                                                                                                           | ( <a href="#">Karaki et al., 1993</a> ) | N/A         |
| Human: HEK293 cells                                                                                                              | ATCC                                    | CRL-1573    |
| Human: HEK293T cells                                                                                                             | ATCC                                    | CRL-3216    |
| African green monkey ( <i>Chlorocebus sabaeus</i> ): Vero cells                                                                  | JCRB                                    | JCRB0111    |
| African green monkey ( <i>Chlorocebus sabaeus</i> ): VeroE6/TMPRSS2 cells                                                        | JCRB                                    | JCRB1819    |
| Human: 293-C34 cells                                                                                                             | ( <a href="#">Torii et al., 2021</a> )  | N/A         |
| Human: Expi293F cells                                                                                                            | Thermo Fisher Scientific                | Cat# A14527 |
| Yeast ( <i>Saccharomyces cerevisiae</i> ): strain EBY100                                                                         | ATCC                                    | MYA-4941    |
| Experimental Models: Organisms/Strains                                                                                           |                                         |             |
|                                                                                                                                  |                                         |             |
| Oligonucleotides                                                                                                                 |                                         |             |
| Forward primer for the preparation of S expression plasmid (pCAGGS-SARS2-S): TTG GGTACC ATG TTT GTG TTC CTG GTG CTG              | This study                              | N/A         |
| Reverse primer for the preparation of S expression plasmid (pCAGGS-SARS2-S): GTG GCGGCCGC TCT AGA TTC AGG TGT AGT GCA GTT T      | This study                              | N/A         |
| Forward primer for the preparation of S L452R expression plasmid (pCAGGS-SARS2-S-L452R): GTG GGA GGC AAC TAC AAC TAC CGT TAC     | This study                              | N/A         |
| Forward primer for the preparation of S Y453F expression plasmid (pCAGGS-SARS2-S-Y453F): GTG GGA GGC AAC TAC AAC TAC CTC TTC AGA | This study                              | N/A         |
| Reverse primer for the preparation of S L452M/L452R/L453F expression plasmid: GTT GTA GTT GCC TCC CAC CTT                        | This study                              | N/A         |
| Forward primer for the preparation of S N501Y expression plasmid (pCAGGS-SARS2-S-N501Y): TCC TAT GGC TTC CAA CCA ACC TAT GGA     | This study                              | N/A         |
| Reverse primer for the preparation of S N501Y expression plasmid (pCAGGS-SARS2-S-N501Y): TGG TTG GAA GCC ATA GGA TTG             | This study                              | N/A         |



|                                                                                                                                                           |                      |     |
|-----------------------------------------------------------------------------------------------------------------------------------------------------------|----------------------|-----|
| Primer for the preparation of RBD L452R expression plasmid (RBD L452R): GGA CAG CAA GGT GGG AGG CAA CTA CAA CTA CAG ATA CAG ACT GTT CAG GAA GAG CAA C     | This study           | N/A |
| Primer for the preparation of RBD Y453F expression plasmid (RBD Y453F): CTC AAA TGG TTT CAG GTT GCT CTT CCT GAA CAG TCT GAA GAG GTA GTT GTA GTT GCC TCC C | This study           | N/A |
| Primer for the preparation of RBD N501Y expression plasmid (RBD N501Y): GTA TGG TTG GTA GCC CAC TCC ATA GGT TGG TTG GAA GCC ATA GGA TTG                   | This study           | N/A |
| Primer for the preparation of the RBD expression plasmid CAT GGG AAA ACA TGT TGT TTA CGG AG                                                               | This study           | N/A |
| Primer for the preparation of the RBD expression plasmid preparation: GCA GCC CCA TAA ACA CAC AGT AT                                                      | This study           | N/A |
| Forward primer for the preparation of Fragment 8, S L452R: CTA AGG TTG GTG GTA ATT ATA ATT ACC GGT ATA GAT TGT TTA GGA AGT CTA ATC                        | This study           | N/A |
| Reverse primer for the preparation of Fragment 8, S L452R: GAT TAG ACT TCC TAA ACA ATC TAT ACC GGT AAT TAT AAT TAC CAC CAA CCT TAG                        | This study           | N/A |
| Forward primer for the preparation of Fragment 8, S Y453F: GGT TGG TGG TAA TTA TAA TTA CCT GTT TAG ATT GTT TAG GAA GTC TAA TCT C                          | This study           | N/A |
| Reverse primer for the preparation of Fragment 8, S Y453F: GAG ATT AGA CTT CCT AAA CAA TCT AAA CAG GTA ATT ATA ATT ACC ACC AAC C                          | This study           | N/A |
| Forward primer for the preparation of Fragment 8, S N501Y: CAA TCA TAT GGT TTC CAA CCC ACT TAT GGT GTT GGT TAC CAA CCA TAC AG                             | This study           | N/A |
| Reverse primer for the preparation of Fragment 8, S N501Y: CTG TAT GGT TGG TAA CCA ACA CCA TAA GTG GGT TGG AAA CCA TAT GAT TG                             | This study           | N/A |
| SARS-CoV-2 S forward primer for the mutation verification (WK-521, 22607-22630 forward): GCA TCT GTT TAT GCT TGG AAC AGG                                  | (Torii et al., 2021) | N/A |

|                                                                                                                             |                           |             |
|-----------------------------------------------------------------------------------------------------------------------------|---------------------------|-------------|
| SARS-CoV-2 S reverse primer for the mutation verification (WK-521, 23342-23367 reverse): CCT GGT GTT ATA ACA CTG ACA CCA CC | (Torii et al., 2021)      | N/A         |
| SARS-CoV-2 N forward primer for real-time RT-PCR: AGC CTC TTC TCG TTC CTC ATC AC                                            | This study                | N/A         |
| SARS-CoV-2 N reverse primer for real-time RT-PCR: CCG CCA TTG CCA GCC ATT C                                                 | This study                | N/A         |
| Recombinant DNA                                                                                                             |                           |             |
| Plasmid: pC-SARS2-S                                                                                                         | (Ozono et al., 2021)      | N/A         |
| Plasmid: pCAGGS                                                                                                             | (Niwa et al., 1991)       | N/A         |
| Plasmid: pCAGGS-SARS2-S                                                                                                     | This study                | N/A         |
| Plasmid: pCAGGS-SARS2-S-L452R                                                                                               | This study                | N/A         |
| Plasmid: pCAGGS-SARS2-S-Y453F                                                                                               | This study                | N/A         |
| Plasmid: pCAGGS-SARS2-S-N501Y                                                                                               | This study                | N/A         |
| Plasmid: pTarget-human ACE2                                                                                                 | (Fukushi et al., 2007)    | N/A         |
| Plasmid: pLV-EF1a-IRES-Puro                                                                                                 | Addgene                   | Cat# #85132 |
| Plasmid: pLV-EF1a-human ACE2-IRES-Puro                                                                                      | This study                | N/A         |
| Plasmid: pHL-sec                                                                                                            | Addgene                   | Cat# 99845  |
| Plasmid: pHL-sec-human ACE2 (residues 18-740)                                                                               | (Zahradnik et al., 2021a) | N/A         |
| Plasmid: pJYDC1                                                                                                             | Addgene                   | Cat# 162458 |
| Plasmid: pJYDC1-SARS-CoV-2 S RBD (residues 336-528)                                                                         | (Zahradnik et al., 2021a) | N/A         |
| Plasmid: pJYDC1-SARS-CoV-2 S RBD L452R                                                                                      | This study                | N/A         |
| Plasmid: pJYDC1-SARS-CoV-2 S RBD Y453F                                                                                      | This study                | N/A         |
| Plasmid: pJYDC1-SARS-CoV-2 S RBD N501Y                                                                                      | This study                | N/A         |
| Plasmid: psPAX2-IN/HiBiT                                                                                                    | (Ozono et al., 2020)      | N/A         |
| Plasmid: pWPI-Luc2                                                                                                          | (Ozono et al., 2020)      | N/A         |
| Plasmid: pC-TMPRSS2                                                                                                         | (Ozono et al., 2021)      | N/A         |
| Plasmid: pC-ACE2                                                                                                            | (Ozono et al., 2021)      | N/A         |
| Plasmid: pΔ-NRF                                                                                                             | (Naldini et al., 1996)    | N/A         |
| Plasmid: pVSV-G                                                                                                             | Addgene                   | Cat# 138479 |
| Plasmid: template plasmids for the preparation of the partial SARS-CoV-2 genome fragments for CPER, see <b>Table S6</b>     | (Torii et al., 2021)      | N/A         |
| Software and Algorithms                                                                                                     |                           |             |

|                                           |                                                    |                                                                                                                       |
|-------------------------------------------|----------------------------------------------------|-----------------------------------------------------------------------------------------------------------------------|
| MAFFT suite (v7.467)                      | ( <a href="#">Kato and Standley, 2013</a> )        | <a href="https://mafft.cbrc.jp/alignment/software/">https://mafft.cbrc.jp/alignment/software/</a>                     |
| ModelTest-NG (v0.1.5)                     | ( <a href="#">Darriba et al., 2020</a> )           | <a href="https://github.com/ddarriba/modeltest">https://github.com/ddarriba/modeltest</a>                             |
| RAxML-NG (v1.0.0)                         | ( <a href="#">Kozlov et al., 2019</a> )            | <a href="https://github.com/amkozlov/raxml-ng">https://github.com/amkozlov/raxml-ng</a>                               |
| FigTree (v1.4.4)                          | Andrew Rambaut                                     | <a href="http://tree.bio.ed.ac.uk/software/figtree">http://tree.bio.ed.ac.uk/software/figtree</a>                     |
| trimAl (v1.4.rev22)                       | ( <a href="#">Capella-Gutierrez et al., 2009</a> ) | <a href="http://trimal.cgenomics.org">http://trimal.cgenomics.org</a>                                                 |
| Python (v3.7)                             | Python Software Foundation                         | <a href="https://www.python.org">https://www.python.org</a>                                                           |
| Sequencher (v5.1)                         | Gene Codes Corporation                             | N/A                                                                                                                   |
| PyMOL (v2.3.0)                            | Schrödinger                                        | <a href="https://pymol.org/2/">https://pymol.org/2/</a>                                                               |
| UCSF Chimera (v1.13)                      | ( <a href="#">Pettersen et al., 2004</a> )         | N/A                                                                                                                   |
| Prism                                     | GraphPad Software                                  | <a href="https://www.graphpad.com/scientific-software/prism/">https://www.graphpad.com/scientific-software/prism/</a> |
| Tracy                                     | ( <a href="#">Rausch et al., 2020</a> )            | <a href="https://www.gear-genomics.com/teal/">https://www.gear-genomics.com/teal/</a>                                 |
| Other                                     |                                                    |                                                                                                                       |
| GISAID                                    | Freunde von GISAID e.V.                            | <a href="https://www.gisaid.org">https://www.gisaid.org</a>                                                           |
| Pangolin                                  | ( <a href="#">Rambaut et al., 2020</a> )           | <a href="https://covid19-lineages.org/pangolin.html">https://covid19-lineages.org/pangolin.html</a>                   |
| 0.45-µm pore size filter                  | Thermo Fisher Scientific                           | Cat# 09-740-114                                                                                                       |
| 40-µm cell strainer                       | SPL Life Sciences                                  | Cat# 93040                                                                                                            |
| HisTrap Fast Flow column                  | Cytiva                                             | Cat# 17-5255-01                                                                                                       |
| Ultracel-3 regenerated cellulose membrane | Merck                                              | Cat# UFC900324                                                                                                        |
| 0.45-µm pore size filter                  | Merck                                              | Cat# SLGVR33RB                                                                                                        |
